# Supplementary material for: Analysis of the DNA-Binding Activities of the Arabidopsis R2R3-MYB Transcription Factor Family by One-Hybrid Experiments in Yeast
Source: PubMed Central journal article supplement (PMC4613820; doi:10.1371/journal.pone.0141044), 2015-10-20
Supplement: pone.0141044.s001.pdf [file pone.0141044.s001.pdf]

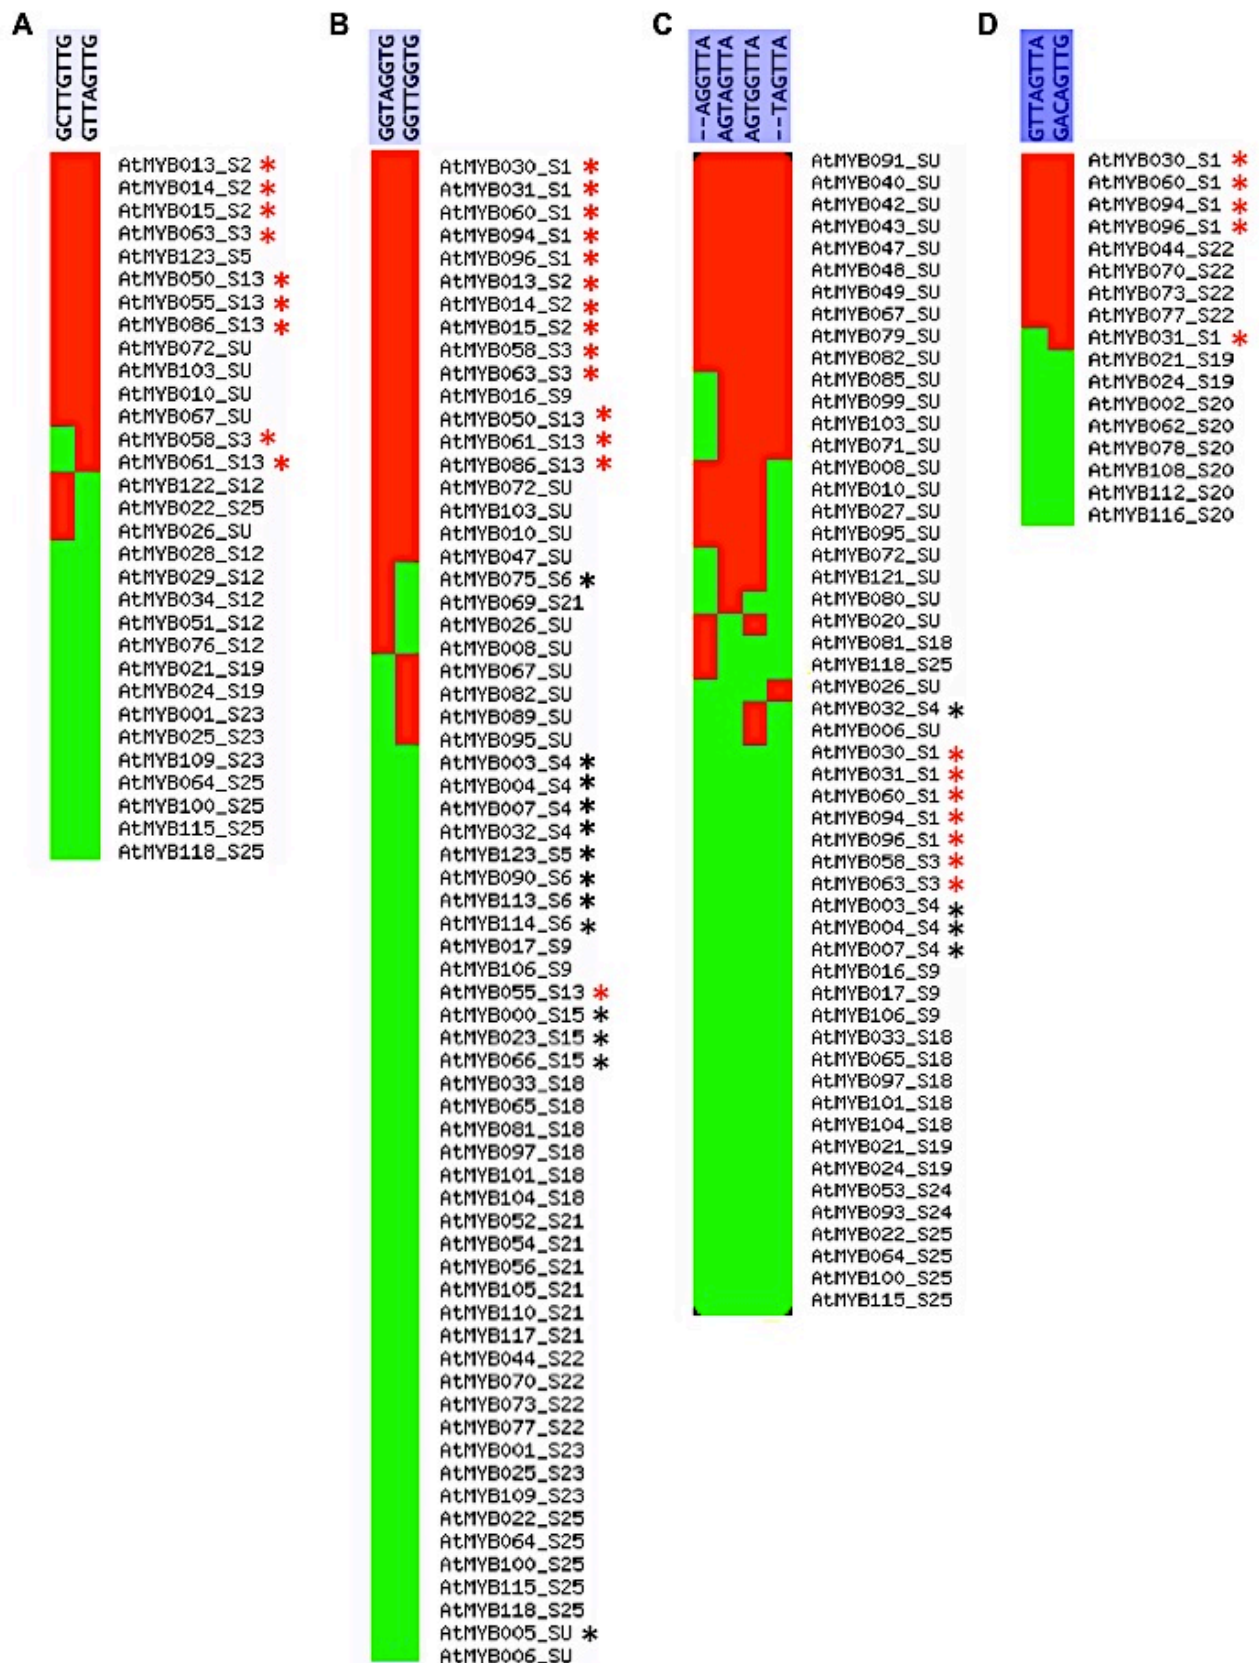

**Figure S1. Binding specificity of selected R2R3-MYB subgroups.** Heat map representation of the Y1H results observed with the most discriminating DNA motifs (*i.e.* interacting with a small set of R2R3-MYB). In this representation are only considered R2R3-MYBs subgroups for which at least 75% of the protein members display a positive or negative interaction with DNA motifs from group (A) Ila, (B) I Ib, (C) I Ic and (D) I Id. Red stars indicate R2R2-MYBs displaying a preferential affinity toward AC-rich DNA sequences. Black stars indicate R2R2-MYBs involved in TTG1-dependent complexes (Zimmermann et al., 2004).
