# Supplementary material for: Analysis of the DNA-Binding Activities of the Arabidopsis R2R3-MYB Transcription Factor Family by One-Hybrid Experiments in Yeast
Source: PubMed Central journal article supplement (PMC4613820; doi:10.1371/journal.pone.0141044), 2015-10-20
Supplement: pone.0141044.s002.pdf [file pone.0141044.s002.pdf]

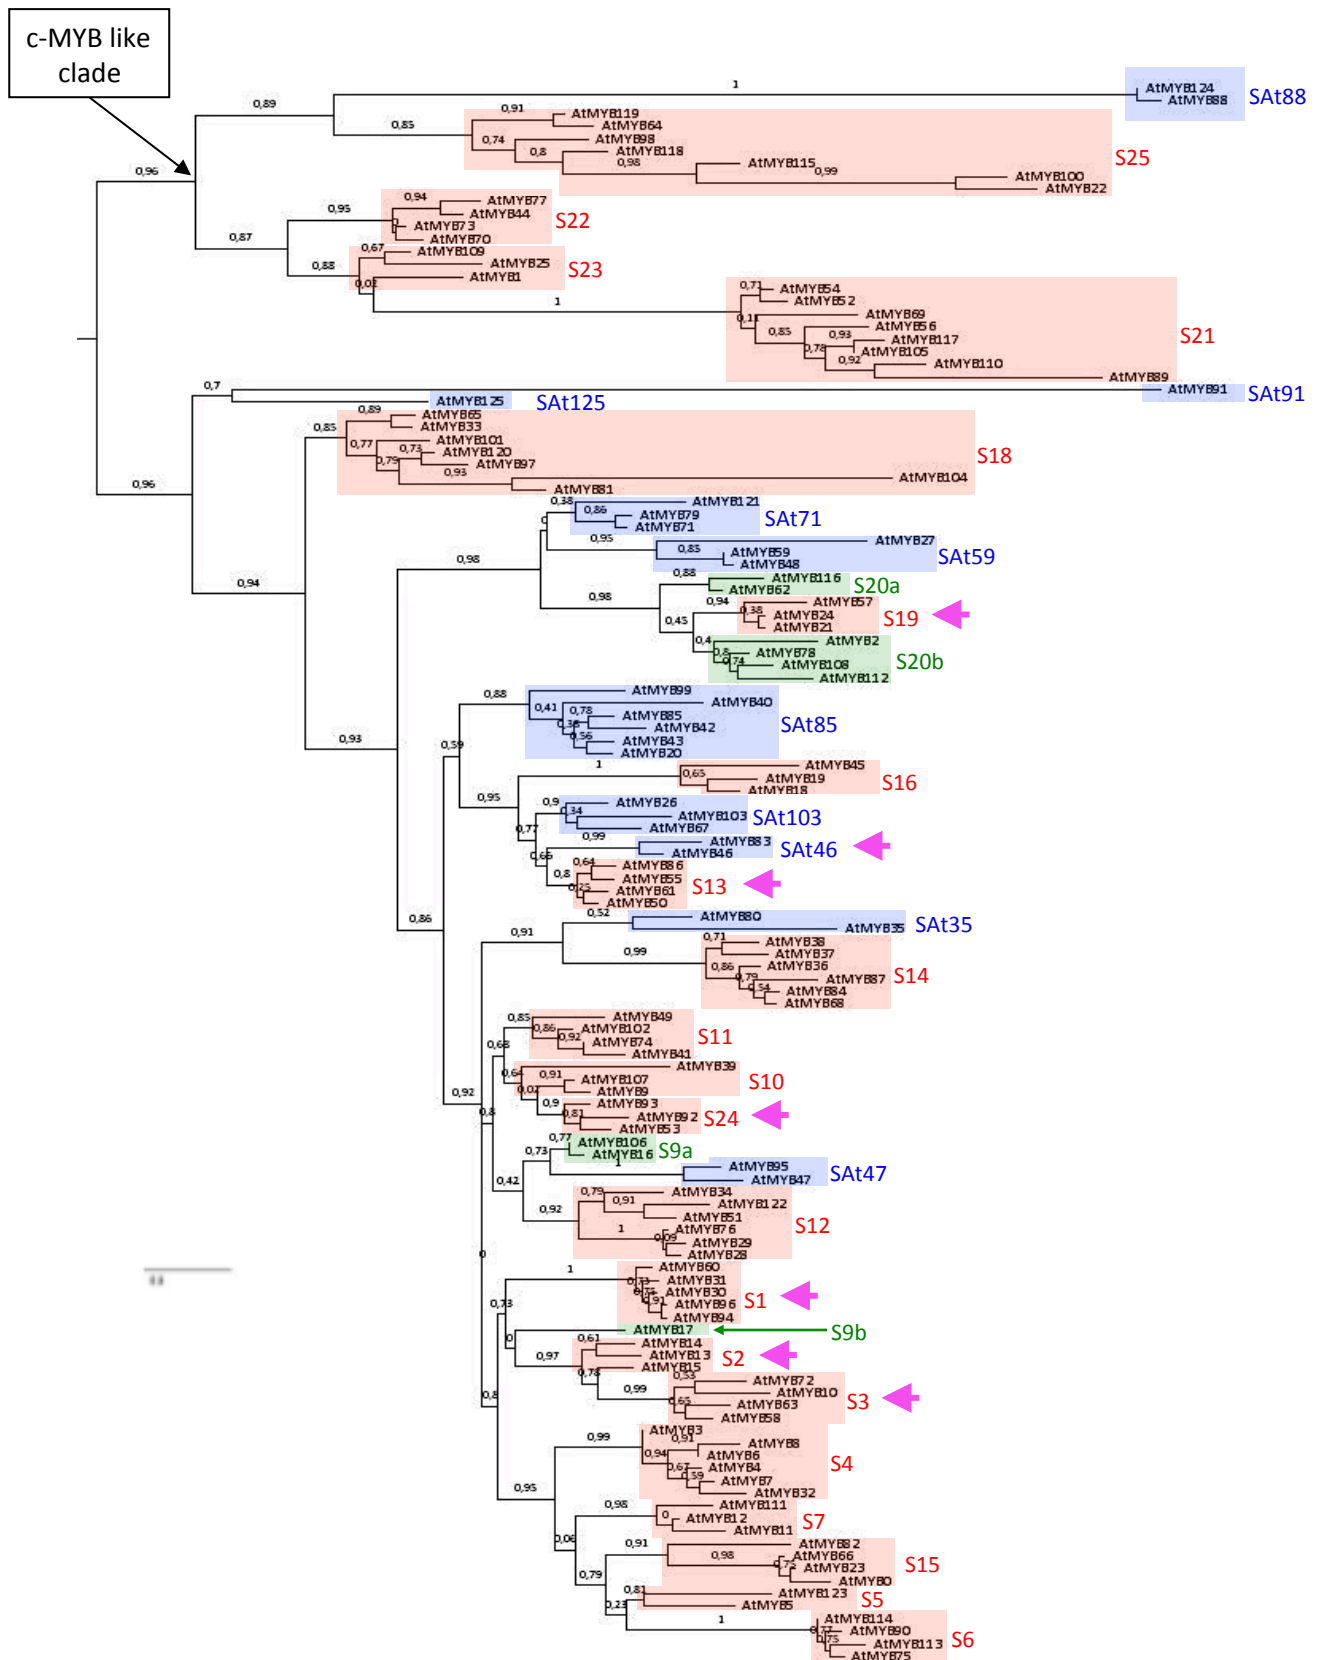

**Figure S2. Maximum Likelihood phylogenetic tree constructed using the R2R3-MYB DNA binding domains (DBDs).** In red: DBD subgroups that match previously described R2R3-MYB subgroups (Dubos et al., 2010; Stracke et al., 2001), in green: DBD subgroups that correspond to split previously described R2R3-MYB subgroups, in blue: DBD subgroups that were not corresponding to any previously described R2R3-MYB subgroups (ungrouped R2R3-MYBs) in *Arabidopsis thaliana*. Pink arrows: DBD subgroups that display a strong *trans*-activation affinity toward the AC-rich DNA sequences.
