# Supplementary material for: Analysis of the DNA-Binding Activities of the Arabidopsis R2R3-MYB Transcription Factor Family by One-Hybrid Experiments in Yeast
Source: PubMed Central journal article supplement (PMC4613820; doi:10.1371/journal.pone.0141044), 2015-10-20
Supplement: pone.0141044.s007.pdf [file pone.0141044.s007.pdf]

**S1 Table. Summary of previously described interactions between R2R3-MYBs and consensus DNA motifs in *Arabidopsis thaliana*.** MYB-core type I: CNGTTR (R=A/G), MYB-core type II: TNGTTR (R=A/G), AC-element ACCWAMY (W=A/T, M=A/C, and Y=T/C) and FLP/MYB88 binding sites: DDCSS (D=A/T/G, and S=C/G). MYB-core like consensus sequences refers to sequences similar to either MYB-core type I or type II. Details are given Table S2.

| Subgroup | R2R3-MYB           | Consensus DNA motif                                 |
|----------|--------------------|-----------------------------------------------------|
| S1       | AtMYB030           | MYB-core type II                                    |
| S1       | AtMYB031 / ATY13   | AC-element                                          |
| S1       | AtMYB060           | AC-element                                          |
| S1       | AtMYB094           | AC-element                                          |
| S1       | AtMYB096           | MYB-core type I and MYB-core type II                |
| S2       | AtMYB013           | MYB-core type I and MYB-core type II                |
| S2       | AtMYB015           | AC-element                                          |
| S3       | AtMYB058           | AC-element                                          |
| S5       | AtMYB123 / TT2     | MYB-core type I and MYB-core type II                |
| S6       | AtMYB075 / PAP1    | AC-element                                          |
| S7       | AtMYB111 / PFG3    | AC-element                                          |
| S10      | AtMYB107           | AC-element                                          |
| S11      | AtMYB102 / AtM4    | AC-element                                          |
| S13      | AtMYB050           | AC-element                                          |
| S13      | AtMYB055           | AC-element                                          |
| S13      | AtMYB061           | AC-element                                          |
| S13      | AtMYB086           | AC-element                                          |
| S14      | AtMYB084           | AC-element                                          |
| S15      | AtMYB000 / GL1     | MYB-core type II                                    |
| S15      | AtMYB023           | MYB-core type II and AC-element                     |
| S15      | AtMYB066 / WER     | MYB-core type I, MYB-core type II and AC-element    |
| S16      | AtMYB019           | AC-element                                          |
| S16      | AtMYB045           | AC-element                                          |
| S18      | AtMYB033           | AC-element                                          |
| S18      | AtMYB081           | AC-element                                          |
| S19      | AtMYB021           | MYB-core type I, MYB-core type II and MYB-core Like |
| S20      | AtMYB002           | MYB-core type I and AC-element                      |
| S20      | AtMYB108 / BOS1    | AC-element                                          |
| S20      | AtMYB112           | AC-element                                          |
| S21      | AtMYB052           | MYB-core type I and MYB-core type II                |
| S22      | AtMYB044 / AtMYBR1 | MYB-core type I, MYB-core type II and MYB-core Like |
| S22      | AtMYB073           | AC-element                                          |
| S22      | AtMYB077 / AtMYBR2 | MYB-core type I, MYB-core type II and MYB-core Like |
| S24      | AtMYB092           | AC-element                                          |
| S25      | AtMYB118           | MYB-core type I                                     |
|          | AtMYB046           | AC-element                                          |
|          | AtMYB049           | AC-element                                          |
|          | AtMYB059           | AC-element                                          |
|          | AtMYB071 / MYB305  | AC-element                                          |
|          | AtMYB072           | AC-element                                          |
|          | AtMYB083           | AC-element                                          |
|          | AtMYB088           | FLP/MYB88 Binding site                              |
|          | AtMYB091 / AS1     | MYB-core type I and MYB-core Like                   |
|          | AtMYB099           | AC-element                                          |
|          | AtMYB103           | AC-element                                          |
|          | AtMYB124 / FLP     | FLP/MYB88 Binding site                              |
