# Supplementary material for: Analysis of the DNA-Binding Activities of the Arabidopsis R2R3-MYB Transcription Factor Family by One-Hybrid Experiments in Yeast
Source: PubMed Central journal article supplement (PMC4613820; doi:10.1371/journal.pone.0141044), 2015-10-20
Supplement: pone.0141044.s008.pdf [file pone.0141044.s008.pdf]

**S2 Table: Details of previously described interactions between R2R3-MYBs and consensus DNA motifs in *Arabidopsis thaliana*.**

(NB: Reference details are given in the main text or in S3 Table).

| R2R3-MYB           | type             | Name           | Sequence                     | Consensus                     | <i>cis</i> -element | Assay                  | Promoter                     | Reference                                   |
|--------------------|------------------|----------------|------------------------------|-------------------------------|---------------------|------------------------|------------------------------|---------------------------------------------|
| AtMYB000 / GL1     | MYB-core type II | x              | <i>AAAGTTAGTTA</i>           | <i>TNGTTR</i>                 |                     | EMSA                   | x                            | Romero <i>et al.</i> , 1998 - Plant J       |
| AtMYB000 / GL1     | MYB-core type II | MST m2         | <i>aaaGTTAGTTgga</i> (R)     | <i>TNGTTR</i>                 |                     | Y1H, <i>in planta</i>  | <i>AtTTG2</i>                | Ishida <i>et al.</i> , 2007 - Plant Cell    |
| AtMYB000 / GL1     | MYB-core type II | MST m3         | <i>acgTTAGTTgaa</i> (R)      | <i>TNGTTR</i>                 |                     | Y1H, <i>in planta</i>  | <i>AtTTG2</i>                | Ishida <i>et al.</i> , 2007 - Plant Cell    |
| AtMYB002           | MYB-core type I  | x              | <i>gcCAGTTAgt</i>            | <i>CNGTTR</i>                 |                     | EMSA                   | x                            | Urao <i>et al.</i> , 1996 - Plant J         |
| AtMYB002           | AC-element       | GT-motif       | <i>aaAAACCAaat</i> (R)       | <i>ACC(A/T)A(A/C)(T/C)</i>    |                     | EMSA, Protoplasts      | <i>AtADH1</i>                | Hoeren <i>et al.</i> , 1998 - Genetics      |
| AtMYB002           | AC-element       | SMRE3          | <i>ACCAAACAT</i>             | <i>ACC(A/T)A(A/C)(T/C)</i>    |                     | Y1H                    | x                            | Dubos <i>et al.</i> , 2014 - BMC Genom      |
| AtMYB002           | AC-element       | AC-III / SMRE7 | <i>CACCTAAC</i>              | <i>ACC(A/T)A(A/C)(T/C)</i>    |                     | Y1H                    | x                            | Dubos <i>et al.</i> , 2014 - BMC Genom      |
| AtMYB013           | MYB-core type I  | MBSI           | <i>gtCAGTTAgggt</i>          | <i>CNGTTR</i>                 |                     | EMSA                   | x                            | Kirik <i>et al.</i> , 1998 - Plant J        |
| AtMYB013           | MYB-core type II | MBSII          | <i>GTTAgtta</i>              | <i>TNGTTR</i>                 |                     | EMSA                   | x                            | Kirik <i>et al.</i> , 1998 - Plant J        |
| AtMYB015           | AC-element       | x              | <i>CACCTACCG</i> (R)         | <i>ACC(A/T)A(A/C)(T/C)</i>    |                     | EMSA                   | x                            | Romero <i>et al.</i> , 1998 - Plant J       |
| AtMYB015           | AC-element       | x              | <i>CACCTATCG</i> (R)         | x                             |                     | EMSA                   | x                            | Romero <i>et al.</i> , 1998 - Plant J       |
| AtMYB015           | AC-element       | x              | <i>CATCTACCG</i> (R)         | x                             |                     | EMSA                   | x                            | Romero <i>et al.</i> , 1998 - Plant J       |
| AtMYB019           | AC-element       | x              | <i>ACCACAACC</i> (R)         | <i>ACC(A/T)(A/C/T)(A/C/T)</i> |                     | Y1H                    | x                            | Dubos <i>et al.</i> , 2014 - BMC Genom      |
| AtMYB019           | AC-element       | AC-III / SMRE7 | <i>CACCTAAC</i>              | <i>ACC(A/T)A(A/C)(T/C)</i>    |                     | Y1H                    | x                            | Dubos <i>et al.</i> , 2014 - BMC Genom      |
| AtMYB019           | AC-element       | AC-II / SMRE4  | <i>CTAACCAACTAA</i> (R)      | <i>ACC(A/T)(A/C/T)(A/C/T)</i> |                     | Y1H                    | x                            | Dubos <i>et al.</i> , 2014 - BMC Genom      |
| AtMYB021           | MYB-core Like    | x              | <i>CAGTTC</i>                | x                             |                     | EMSA                   | x                            | S5 Fig.                                     |
| AtMYB021           | MYB-core Like    | x              | <i>CATTTA</i>                | x                             |                     | EMSA                   | x                            | S5 Fig.                                     |
| AtMYB021           | MYB-core Like    | x              | <i>CCATTC</i>                | x                             |                     | EMSA                   | x                            | S5 Fig.                                     |
| AtMYB021           | MYB-core Like    | x              | <i>CCGTTT</i>                | x                             |                     | EMSA                   | x                            | S5 Fig.                                     |
| AtMYB021           | MYB-core Like    | x              | <i>CAGTAA</i>                | x                             |                     | EMSA                   | x                            | S5 Fig.                                     |
| AtMYB021           | MYB-core Like    | x              | <i>CGATTA</i>                | x                             |                     | EMSA                   | x                            | S5 Fig.                                     |
| AtMYB021           | MYB-core Like    | x              | <i>CGGTAA</i>                | x                             |                     | EMSA                   | x                            | S5 Fig.                                     |
| AtMYB021           | MYB-core type I  | x              | <i>CCGTTA</i>                | <i>CNGTTR</i>                 |                     | EMSA                   | x                            | S5 Fig.                                     |
| AtMYB021           | MYB-core Like    | x              | <i>CGGTTC</i>                | x                             |                     | EMSA                   | x                            | S5 Fig.                                     |
| AtMYB021           | MYB-core type I  | x              | <i>CGGTGG</i>                | <i>CNGTTR</i>                 |                     | EMSA                   | x                            | S5 Fig.                                     |
| AtMYB021           | MYB-core Like    | x              | <i>CTCTTG</i>                | x                             |                     | EMSA                   | x                            | S5 Fig.                                     |
| AtMYB021           | MYB-core Like    | x              | <i>CTGTAC</i>                | x                             |                     | EMSA                   | x                            | S5 Fig.                                     |
| AtMYB021           | MYB-core Like    | x              | <i>TCGTCA</i>                | x                             |                     | EMSA                   | x                            | S5 Fig.                                     |
| AtMYB021           | MYB-core type II | x              | <i>TCGTTA</i>                | <i>TNGTTR</i>                 |                     | EMSA                   | x                            | S5 Fig.                                     |
| AtMYB021           | MYB-core Like    | x              | <i>TGGTGG</i>                | x                             |                     | EMSA                   | x                            | S5 Fig.                                     |
| AtMYB021           | MYB-core Like    | x              | <i>TGGTTT</i>                | x                             |                     | EMSA                   | x                            | S5 Fig.                                     |
| AtMYB021           | MYB-core Like    | x              | <i>TGTTCT</i>                | x                             |                     | EMSA                   | x                            | S5 Fig.                                     |
| AtMYB023           | MYB-core type II | WBS I-L1       | <i>ttaTcttGTtagttg</i>       | <i>TNGTTR</i>                 |                     | EMSA                   | <i>AtMYB23</i>               | Kang <i>et al.</i> , 2009 - Plant Cell      |
| AtMYB023           | MYB-core type II | WBS II-L2      | <i>ttagttaGTTGggcaaa</i> (R) | <i>TNGTTR (x2)</i>            |                     | EMSA                   | <i>AtMYB23</i>               | Kang <i>et al.</i> , 2009 - Plant Cell      |
| AtMYB023           | MYB-core type II | WBS I/II-L1    | <i>tattaGTTGaaaac</i> (R)    | <i>TNGTTR</i>                 |                     | EMSA                   | <i>AtMYB23</i>               | Kang <i>et al.</i> , 2009 - Plant Cell      |
| AtMYB023           | AC-element       | WBS II-L1      | <i>aaacCAACaaga</i>          | <i>ACC(A/T)(A/C/T)(A/C/T)</i> |                     | EMSA                   | <i>AtMYB23</i>               | Kang <i>et al.</i> , 2009 - Plant Cell      |
| AtMYB023           | MYB-core type II | WBS II-L1      | <i>tcttGTTGgttt</i> (R)      | <i>TNGTTR</i>                 |                     | EMSA                   | <i>AtMYB23</i>               | Kang <i>et al.</i> , 2009 - Plant Cell      |
| AtMYB023           | MYB-core type II | WBS II-L1      | <i>ggcttGTTGactct</i> (R)    | <i>TNGTTR</i>                 |                     | EMSA                   | <i>AtMYB23</i>               | Kang <i>et al.</i> , 2009 - Plant Cell      |
| AtMYB030           | MYB-core type II | MYB1           | <i>GTTTGTta</i>              | <i>TNGTTR</i>                 |                     | EMSA                   | <i>AtSAUR-AC1</i>            | Li <i>et al.</i> , 2009 - Plant J           |
| AtMYB031 / ATY13   | AC-element       | x              | <i>ACCACAACC</i> (R)         | <i>ACC(A/T)(A/C/T)(A/C/T)</i> |                     | Y1H, Protoplasts       | x                            | Dubos <i>et al.</i> , 2014 - BMC Genom      |
| AtMYB031 / ATY13   | AC-element       | AC-III / SMRE7 | <i>CACCTAAC</i>              | <i>ACC(A/T)A(A/C)(T/C)</i>    |                     | Y1H, Protoplasts       | x                            | Dubos <i>et al.</i> , 2014 - BMC Genom      |
| AtMYB031 / ATY13   | AC-element       | AC-II / SMRE4  | <i>CTAACCAACTAA</i> (R)      | <i>ACC(A/T)(A/C/T)(A/C/T)</i> |                     | Y1H                    | x                            | Dubos <i>et al.</i> , 2014 - BMC Genom      |
| AtMYB033           | AC-element       | AC-II / SMRE4  | <i>CTAACCAACTAA</i> (R)      | <i>ACC(A/T)(A/C/T)(A/C/T)</i> |                     | Y1H                    | x                            | Dubos <i>et al.</i> , 2014 - BMC Genom      |
| AtMYB044 / AtMYBR1 | MYB-core type I  | MBSI           | <i>gtCAGTTAagg</i>           | <i>CNGTTR</i>                 |                     | EMSA                   | x                            | Kirik <i>et al.</i> , 1998 - Plant Mol Biol |
| AtMYB044 / AtMYBR1 | MYB-core type II | MBSII          | <i>aagtTAGTTAag</i>          | <i>TNGTTR</i>                 |                     | EMSA                   | x                            | Kirik <i>et al.</i> , 1998 - Plant Mol Biol |
| AtMYB044 / AtMYBR1 | MYB-core type I  | x              | <i>tcCGGTta</i>              | <i>CNGTTR</i>                 |                     | EMSA, <i>in planta</i> | <i>AtWRKY70</i>              | Shim <i>et al.</i> , 2013 - Plant J         |
| AtMYB044 / AtMYBR1 | MYB-core type I  | x              | <i>CCGGTA</i>                | <i>CNGTTR</i>                 |                     | Oligo Arrays           | <i>AtERA1</i>                | Jung <i>et al.</i> , 2012 - Mol Cells       |
| AtMYB044 / AtMYBR1 | MYB-core type I  | x              | <i>CAGTTA</i>                | <i>CNGTTR</i>                 |                     | Oligo Arrays, EMSA     | <i>AtABIS, AtERD1, AtFCA</i> | Jung <i>et al.</i> , 2012 - Mol Cells       |
| AtMYB044 / AtMYBR1 | MYB-core type I  | x              | <i>CCGTTA</i>                | <i>CNGTTR</i>                 |                     | Oligo Arrays           | x                            | Jung <i>et al.</i> , 2012 - Mol Cells       |
| AtMYB044 / AtMYBR1 | MYB-core type I  | x              | <i>CCGTTT</i>                | <i>CNGTTR</i>                 |                     | Oligo Arrays           | x                            | Jung <i>et al.</i> , 2012 - Mol Cells       |
| AtMYB044 / AtMYBR1 | MYB-core type I  | x              | <i>CCGTTG</i>                | <i>CNGTTR</i>                 |                     | Oligo Arrays           | x                            | Jung <i>et al.</i> , 2012 - Mol Cells       |

|                   |                  |                |                               |                                 |                        |                 |                                            |
|-------------------|------------------|----------------|-------------------------------|---------------------------------|------------------------|-----------------|--------------------------------------------|
| AtMYB044 / AtMYB1 | MYB-core Like    | x              | <b>CAGTTC</b>                 | x                               | Oligo Arrays           | x               | Jung <i>et al.</i> , 2012 - Mol Cells      |
| AtMYB044 / AtMYB1 | MYB-core Like    | x              | <b>CCGGTA</b>                 | x                               | Oligo Arrays           | x               | Jung <i>et al.</i> , 2012 - Mol Cells      |
| AtMYB044 / AtMYB1 | MYB-core Like    | x              | <b>CCGGTAT</b>                | x                               | Oligo Arrays           | x               | Jung <i>et al.</i> , 2012 - Mol Cells      |
| AtMYB044 / AtMYB1 | MYB-core type II | x              | <b>TAGTTG</b>                 | <b>TNGTTR</b>                   | Oligo Arrays           | x               | Jung <i>et al.</i> , 2012 - Mol Cells      |
| AtMYB044 / AtMYB1 | MYB-core Like    | x              | <b>CAGGTA</b>                 | x                               | Oligo Arrays           | x               | Jung <i>et al.</i> , 2012 - Mol Cells      |
| AtMYB044 / AtMYB1 | MYB-core Like    | x              | <b>AGGTAA</b>                 | x                               | Oligo Arrays           | x               | Jung <i>et al.</i> , 2012 - Mol Cells      |
| AtMYB044 / AtMYB1 | MYB-core Like    | x              | <b>CCGGTAA</b>                | x                               | Oligo Arrays           | x               | Jung <i>et al.</i> , 2012 - Mol Cells      |
| AtMYB044 / AtMYB1 | MYB-core Like    | x              | <b>CTGGTA</b>                 | x                               | Oligo Arrays           | x               | Jung <i>et al.</i> , 2012 - Mol Cells      |
| AtMYB044 / AtMYB1 | MYB-core Like    | x              | <b>CCGGTA</b>                 | x                               | Oligo Arrays           | x               | Jung <i>et al.</i> , 2012 - Mol Cells      |
| AtMYB044 / AtMYB1 | MYB-core type I  | x              | <b>CCGGTG</b>                 | <b>CNGTTR</b>                   | Oligo Arrays           | x               | Jung <i>et al.</i> , 2012 - Mol Cells      |
| AtMYB045          | AC-element       | x              | <b>ACCACAACC</b> (R)          | <b>ACC(A/T)(A/C/T)(A/C/T)</b>   | Y1H                    | x               | Dubos <i>et al.</i> , 2014 - BMC Genom     |
| AtMYB045          | AC-element       | AC-II / SMRE4  | <b>CTAACCAACTAA</b> (R)       | <b>ACC(A/T)(A/C/T)(A/C/T)</b>   | Y1H                    | x               | Dubos <i>et al.</i> , 2014 - BMC Genom     |
| AtMYB046          | AC-element       | M46RE          | <b>CACCTACT</b>               | <b>(C/T)ACC(A/T)A(A/C)(C/T)</b> | EMSA, Protoplasts      | <b>AtC3H14</b>  | Kim <i>et al.</i> , 2012 - Plant Mol Biol  |
| AtMYB046          | AC-element       | SMRE1          | <b>ACCAAAT</b>                | <b>ACC(A/T)A(A/C)(T/C)</b>      | EMSA, Protoplasts      | <b>AtMYB063</b> | Zhong and Ye, 2012 - Plant Cell Physiol    |
| AtMYB046          | AC-element       | SMRE2          | <b>ACCAAT</b>                 | <b>ACC(A/T)A(A/C)(T/C)</b>      | EMSA, Protoplasts      | x               | Zhong and Ye, 2012 - Plant Cell Physiol    |
| AtMYB046          | AC-element       | SMRE3          | <b>ACCAAAC</b>                | <b>ACC(A/T)A(A/C)(T/C)</b>      | EMSA, Protoplasts      | x               | Zhong and Ye, 2012 - Plant Cell Physiol    |
| AtMYB046          | AC-element       | AC-II / SMRE4  | <b>ACCAACC</b>                | <b>ACC(A/T)A(A/C)(T/C)</b>      | EMSA, Protoplasts      | x               | Zhong and Ye, 2012 - Plant Cell Physiol    |
| AtMYB046          | AC-element       | SMRE5          | <b>ACCTAAT</b>                | <b>ACC(A/T)A(A/C)(T/C)</b>      | EMSA, Protoplasts      | x               | Zhong and Ye, 2012 - Plant Cell Physiol    |
| AtMYB046          | AC-element       | SMRE6          | <b>CACCTACT</b>               | <b>ACC(A/T)A(A/C)(T/C)</b>      | EMSA, Protoplasts      | x               | Zhong and Ye, 2012 - Plant Cell Physiol    |
| AtMYB046          | AC-element       | AC-III / SMRE7 | <b>ACCTAAC</b>                | <b>ACC(A/T)A(A/C)(T/C)</b>      | EMSA, Protoplasts      | x               | Zhong and Ye, 2012 - Plant Cell Physiol    |
| AtMYB046          | AC-element       | AC-I / SMRE8   | <b>ACCTACC</b>                | <b>ACC(A/T)A(A/C)(T/C)</b>      | EMSA, Protoplasts      | x               | Zhong and Ye, 2012 - Plant Cell Physiol    |
| AtMYB046          | AC-element       | AC-III / SMRE7 | <b>TACCTAAC</b> (R)           | <b>ACC(A/T)A(A/C)(T/C)</b>      | Oligo Arrays           | x               | Franco-Zorilla <i>et al.</i> , 2014 - PNAS |
| AtMYB046          | AC-element       | x              | <b>AACCACC</b> (R)            | <b>ACC(A/T)(A/C/T)(A/C/T)</b>   | Oligo Arrays           | x               | Franco-Zorilla <i>et al.</i> , 2014 - PNAS |
| AtMYB049          | AC-element       | x              | <b>ACCACAACC</b> (R)          | <b>ACC(A/T)(A/C/T)(A/C/T)</b>   | Y1H                    | x               | Dubos <i>et al.</i> , 2014 - BMC Genom     |
| AtMYB049          | AC-element       | AC-III / SMRE7 | <b>CACCTAAC</b>               | <b>ACC(A/T)A(A/C)(T/C)</b>      | Y1H                    | x               | Dubos <i>et al.</i> , 2014 - BMC Genom     |
| AtMYB049          | AC-element       | AC-II / SMRE4  | <b>CTAACCAACTAA</b> (R)       | <b>ACC(A/T)(A/C/T)(A/C/T)</b>   | Y1H                    | x               | Dubos <i>et al.</i> , 2014 - BMC Genom     |
| AtMYB050          | AC-element       | x              | <b>ACCACAACC</b> (R)          | <b>ACC(A/T)(A/C/T)(A/C/T)</b>   | Y1H                    | x               | Dubos <i>et al.</i> , 2014 - BMC Genom     |
| AtMYB050          | AC-element       | AC-III / SMRE7 | <b>CACCTAAC</b>               | <b>ACC(A/T)A(A/C)(T/C)</b>      | Y1H                    | x               | Dubos <i>et al.</i> , 2014 - BMC Genom     |
| AtMYB050          | AC-element       | AC-II / SMRE4  | <b>CTAACCAACTAA</b> (R)       | <b>ACC(A/T)(A/C/T)(A/C/T)</b>   | Y1H                    | x               | Dubos <i>et al.</i> , 2014 - BMC Genom     |
| AtMYB052          | MYB-core type I  | x              | <b>CCGTTA</b>                 | <b>CNGTTR</b>                   | Oligo Arrays           | x               | Franco-Zorilla <i>et al.</i> , 2014 - PNAS |
| AtMYB052          | MYB-core type II | x              | <b>GTTAGTTG</b>               | <b>TNGTTR</b>                   | Oligo Arrays           | x               | Franco-Zorilla <i>et al.</i> , 2014 - PNAS |
| AtMYB055          | AC-element       | SMRE8 / AC-I   | <b>ACCTACCC</b> (R)           | <b>ACC(A/T)A(A/C)(T/C)</b>      | Oligo Arrays           | x               | Franco-Zorilla <i>et al.</i> , 2014 - PNAS |
| AtMYB055          | AC-element       | x              | <b>CAACCACC</b> (R)           | <b>ACC(A/T)(A/C/T)(A/C/T)</b>   | Oligo Arrays           | x               | Franco-Zorilla <i>et al.</i> , 2014 - PNAS |
| AtMYB058          | AC-element       | x              | <b>ACCACAACC</b> (R)          | <b>ACC(A/T)(A/C/T)(A/C/T)</b>   | Y1H                    | x               | Dubos <i>et al.</i> , 2014 - BMC Genom     |
| AtMYB058          | AC-element       | AC-III / SMRE7 | <b>CACCTAAC</b>               | <b>ACC(A/T)A(A/C)(T/C)</b>      | Y1H                    | x               | Dubos <i>et al.</i> , 2014 - BMC Genom     |
| AtMYB058          | AC-element       | AC-II / SMRE4  | <b>CTAACCAACTAA</b> (R)       | <b>ACC(A/T)(A/C/T)(A/C/T)</b>   | Y1H                    | x               | Dubos <i>et al.</i> , 2014 - BMC Genom     |
| AtMYB059          | AC-element       | AC-III / SMRE7 | <b>ACCTAAC</b> (R)            | <b>ACC(A/T)A(A/C)(T/C)</b>      | Oligo Arrays           | x               | Franco-Zorilla <i>et al.</i> , 2014 - PNAS |
| AtMYB060          | AC-element       | x              | <b>ACCACAACC</b> (R)          | <b>ACC(A/T)(A/C/T)(A/C/T)</b>   | Y1H                    | x               | Dubos <i>et al.</i> , 2014 - BMC Genom     |
| AtMYB060          | AC-element       | AC-III / SMRE7 | <b>CACCTAAC</b>               | <b>ACC(A/T)A(A/C)(T/C)</b>      | Y1H                    | x               | Dubos <i>et al.</i> , 2014 - BMC Genom     |
| AtMYB060          | AC-element       | AC-II / SMRE4  | <b>CTAACCAACTAA</b> (R)       | <b>ACC(A/T)(A/C/T)(A/C/T)</b>   | Y1H                    | x               | Dubos <i>et al.</i> , 2014 - BMC Genom     |
| AtMYB061          | AC-element       | AC-III / SMRE7 | <b>cACCTAAC</b>               | <b>ACC(A/T)A(A/C)(T/C)</b>      | EMSA, Y1H              | <b>AtKNAT7</b>  | Romano <i>et al.</i> , 2012 - New Phytol   |
| AtMYB061          | AC-element       | AC-I / SMRE8   | <b>ACCTAC</b>                 | <b>ACC(A/T)(A/C/T)(A/C/T)</b>   | EMSA, Y1H              | x               | Prouse and Campbell, 2012 - PLOS one       |
| AtMYB061          | AC-element       | x              | <b>ACCAAT</b>                 | <b>ACC(A/T)(A/C/T)(A/C/T)</b>   | EMSA, Y1H              | x               | Prouse and Campbell, 2012 - PLOS one       |
| AtMYB061          | AC-element       | x              | <b>ACCAAA</b>                 | <b>ACC(A/T)(A/C/T)(A/C/T)</b>   | EMSA, Y1H              | x               | Prouse and Campbell, 2012 - PLOS one       |
| AtMYB061          | AC-element       | x              | <b>ACCATATA</b>               | <b>ACC(A/T)(A/C/T)(A/C/T)</b>   | EMSA, Y1H              | x               | Prouse and Campbell, 2012 - PLOS one       |
| AtMYB061          | AC-element       | AC-II / SMRE4  | <b>ACCAAC</b>                 | <b>ACC(A/T)(A/C/T)(A/C/T)</b>   | EMSA, Y1H              | x               | Prouse and Campbell, 2012 - PLOS one       |
| AtMYB061          | AC-element       | x              | <b>ACCACA</b>                 | <b>ACC(A/T)(A/C/T)(A/C/T)</b>   | EMSA, Y1H              | x               | Prouse and Campbell, 2012 - PLOS one       |
| AtMYB061          | AC-element       | x              | <b>ACCACC</b>                 | <b>ACC(A/T)(A/C/T)(A/C/T)</b>   | EMSA, Y1H              | x               | Prouse and Campbell, 2012 - PLOS one       |
| AtMYB061          | AC-element       | x              | <b>ACCACAACC</b> (R)          | <b>ACC(A/T)(A/C/T)(A/C/T)</b>   | Y1H, Protoplasts       | x               | Dubos <i>et al.</i> , 2014 - BMC Genom     |
| AtMYB061          | AC-element       | AC-III / SMRE7 | <b>CACCTAAC</b>               | <b>ACC(A/T)A(A/C)(T/C)</b>      | Y1H, Protoplasts       | x               | Dubos <i>et al.</i> , 2014 - BMC Genom     |
| AtMYB061          | AC-element       | AC-II / SMRE4  | <b>CTAACCAACTAA</b> (R)       | <b>ACC(A/T)(A/C/T)(A/C/T)</b>   | Y1H                    | x               | Dubos <i>et al.</i> , 2014 - BMC Genom     |
| AtMYB066 / WER    | MYB-core type II | WBS I-L1       | <b>ttaTcttGTTagt</b>          | <b>TNGTTR</b>                   | EMSA, <i>in planta</i> | <b>AtMYB23</b>  | Kang <i>et al.</i> , 2009 - Plant Cell     |
| AtMYB066 / WER    | MYB-core type II | WBS II-L2      | <b>ttagttaGTTGtggcaaa</b> (R) | <b>TNGTTR (x2)</b>              | EMSA                   | <b>AtMYB23</b>  | Kang <i>et al.</i> , 2009 - Plant Cell     |
| AtMYB066 / WER    | MYB-core type II | WBS I/II-L1    | <b>tattaGTTGaaac</b> (R)      | <b>TNGTTR</b>                   | EMSA                   | <b>AtMYB23</b>  | Kang <i>et al.</i> , 2009 - Plant Cell     |
| AtMYB066 / WER    | AC-element       | WBS II-L1      | <b>aaaccAACaaga</b>           | <b>ACC(A/T)(A/C/T)(A/C/T)</b>   | EMSA                   | <b>AtMYB23</b>  | Kang <i>et al.</i> , 2009 - Plant Cell     |
| AtMYB066 / WER    | MYB-core type II | WBS II-L1      | <b>tcctGTTGgttt</b> (R)       | <b>TNGTTR</b>                   | EMSA                   | <b>AtMYB23</b>  | Kang <i>et al.</i> , 2009 - Plant Cell     |

|                    |                        |                |                           |                                  |                        |                  |                                                          |
|--------------------|------------------------|----------------|---------------------------|----------------------------------|------------------------|------------------|----------------------------------------------------------|
| AtMYB066 / WER     | MYB-core type II       | WBS II-L1      | <i>ggcttGTTGactct</i> (R) | <i>TNGTTR</i>                    | EMSA                   | <i>AtMYB23</i>   | Kang <i>et al.</i> , 2009 - Plant Cell                   |
| AtMYB066 / WER     | MYB-core type II       | MST m2         | <i>aaaGTTAGTTgga</i> (R)  | <i>TNGTTR</i>                    | Y1H, <i>in planta</i>  | <i>AtTTG2</i>    | Ishida <i>et al.</i> , 2007 - Plant Cell                 |
| AtMYB066 / WER     | MYB-core type II       | MST m3         | <i>acgTTAGTTgaa</i> (R)   | <i>TNGTTR</i>                    | Y1H, <i>in planta</i>  | <i>AtTTG2</i>    | Ishida <i>et al.</i> , 2007 - Plant Cell                 |
| AtMYB066 / WER     | MYB-core type I        | CPC MBS1       | <i>gacAGTTGGAGaaa</i> (R) | <i>CNGTTR</i>                    | EMSA                   | <i>AtCPC</i>     | Koshino-Kimura <i>et al.</i> , 2005 - Plant Cell Physiol |
| AtMYB066 / WER     | MYB-core type I        | GL2 MBS1       | <i>cttaCCGTTAgtc</i> (R)  | <i>CNGTTR</i>                    | EMSA, <i>in planta</i> | <i>AtGL2</i>     | Koshino-Kimura <i>et al.</i> , 2005 - Plant Cell Physiol |
| AtMYB066 / WER     | MYB-core type I        | GL2 MBS2       | <i>tataCTGTTAgtta</i> (R) | <i>CNGTTR</i>                    | EMSA, <i>in planta</i> | <i>AtGL2</i>     | Koshino-Kimura <i>et al.</i> , 2005 - Plant Cell Physiol |
| AtMYB066 / WER     | MYB-core type I        | GWBSI          | <i>aaaTgcgGTTgg</i>       | <i>CNGTTR</i>                    | EMSA, Y1H              | <i>AtGL2</i>     | Song <i>et al.</i> , 2011 - Plant Physiol                |
| AtMYB066 / WER     | MYB-core type II       | GWBSII         | <i>aaGTaGTTga</i>         | <i>TNGTTR</i>                    | EMSA, Y1H              | <i>AtGL2</i>     | Song <i>et al.</i> , 2011 - Plant Physiol                |
| AtMYB071 / MYB305  | AC-element             | SMRE3          | <i>ACCAAACAT</i>          | <i>ACC(A/T)A(A/C)(T/C)</i>       | Y1H                    | x                | Dubos <i>et al.</i> , 2014 - BMC Genom                   |
| AtMYB072           | AC-element             | AC-III / SMRE7 | <i>CACCTAAC</i>           | <i>ACC(A/T)A(A/C)(T/C)</i>       | Y1H                    | x                | Dubos <i>et al.</i> , 2014 - BMC Genom                   |
| AtMYB073           | AC-element             | AC-II / SMRE4  | <i>CTAACCAACTAA</i> (R)   | <i>ACC(A/T)(A/C/T)(A/C/T)</i>    | Y1H                    | x                | Dubos <i>et al.</i> , 2014 - BMC Genom                   |
| AtMYB075 / PAP1    | AC-element             | x              | <i>ACCACAACC</i> (R)      | <i>ACC(A/T)(A/C/T)(A/C/T)</i>    | Y1H                    | x                | Dubos <i>et al.</i> , 2014 - BMC Genom                   |
| AtMYB077 / AtMYBR2 | MYB-core type II       | x              | <i>AAAGTTAGTTA</i>        | <i>TNGTTR</i>                    | EMSA                   | x                | Romero <i>et al.</i> , 1998 - Plant J                    |
| AtMYB077 / AtMYBR2 | MYB-core type I        | x              | <i>AAAAAAACGGTTA</i>      | <i>CNGTTR</i>                    | EMSA                   | x                | Romero <i>et al.</i> , 1998 - Plant J                    |
| AtMYB077 / AtMYBR2 | MYB-core type I        | x              | <i>TGACAGTTA</i>          | <i>CNGTTR</i>                    | EMSA                   | x                | Romero <i>et al.</i> , 1998 - Plant J                    |
| AtMYB077 / AtMYBR2 | MYB-core type I        | x              | <i>CAGTTA</i> (R)         | <i>CNGTTR</i>                    | Oligo Arrays           | x                | Oh <i>et al.</i> , 2012 - J Korean Soc Appl Biol Chem    |
| AtMYB077 / AtMYBR2 | MYB-core type I        | x              | <i>CAGTTG</i> (R)         | <i>CNGTTR</i>                    | Oligo Arrays           | x                | Oh <i>et al.</i> , 2012 - J Korean Soc Appl Biol Chem    |
| AtMYB077 / AtMYBR2 | MYB-core type I        | x              | <i>CCGTTA</i> (R)         | <i>CNGTTR</i>                    | Oligo Arrays           | x                | Oh <i>et al.</i> , 2012 - J Korean Soc Appl Biol Chem    |
| AtMYB077 / AtMYBR2 | MYB-core Like          | x              | <i>CCGGTA</i> (R)         | x                                | Oligo Arrays           | x                | Oh <i>et al.</i> , 2012 - J Korean Soc Appl Biol Chem    |
| AtMYB077 / AtMYBR2 | MYB-core type I        | x              | <i>CCGTTG</i> (R)         | <i>CNGTTR</i>                    | Oligo Arrays           | x                | Oh <i>et al.</i> , 2012 - J Korean Soc Appl Biol Chem    |
| AtMYB077 / AtMYBR2 | MYB-core Like          | x              | <i>CCGTTT</i> (R)         | x                                | Oligo Arrays           | x                | Oh <i>et al.</i> , 2012 - J Korean Soc Appl Biol Chem    |
| AtMYB077 / AtMYBR2 | MYB-core type I        | x              | <i>CCGTTA</i> (R)         | <i>CNGTTR</i>                    | Oligo Arrays           | x                | Oh <i>et al.</i> , 2012 - J Korean Soc Appl Biol Chem    |
| AtMYB077 / AtMYBR2 | MYB-core type I        | x              | <i>CCGTTG</i> (R)         | <i>CNGTTR</i>                    | Oligo Arrays           | x                | Oh <i>et al.</i> , 2012 - J Korean Soc Appl Biol Chem    |
| AtMYB077 / AtMYBR2 | MYB-core Like          | x              | <i>CCGTTT</i> (R)         | x                                | Oligo Arrays           | x                | Oh <i>et al.</i> , 2012 - J Korean Soc Appl Biol Chem    |
| AtMYB077 / AtMYBR2 | MYB-core type I        | x              | <i>CTGTTA</i> (R)         | <i>CNGTTR</i>                    | Oligo Arrays           | x                | Oh <i>et al.</i> , 2012 - J Korean Soc Appl Biol Chem    |
| AtMYB077 / AtMYBR2 | MYB-core type II       | x              | <i>TAGTTA</i> (R)         | <i>TNGTTR</i>                    | Oligo Arrays           | x                | Oh <i>et al.</i> , 2012 - J Korean Soc Appl Biol Chem    |
| AtMYB077 / AtMYBR2 | MYB-core Like          | x              | <i>TAGTTT</i> (R)         | x                                | Oligo Arrays           | x                | Oh <i>et al.</i> , 2012 - J Korean Soc Appl Biol Chem    |
| AtMYB077 / AtMYBR2 | MYB-core type II       | x              | <i>TCGTTA</i> (R)         | <i>TNGTTR</i>                    | Oligo Arrays           | x                | Oh <i>et al.</i> , 2012 - J Korean Soc Appl Biol Chem    |
| AtMYB081           | AC-element             | AC-II / SMRE4  | <i>CTAACCAACTAA</i> (R)   | <i>ACC(A/T)(A/C/T)(A/C/T)</i>    | Y1H                    | x                | Dubos <i>et al.</i> , 2014 - BMC Genom                   |
| AtMYB083           | AC-element             | SMRE1          | <i>ACCAAAT</i>            | <i>ACC(A/T)A(A/C)(T/C)</i>       | EMSA, Protoplasts      | <i>AtMYB063</i>  | Zhong and Ye, 2012 - Plant Cell Physiol                  |
| AtMYB083           | AC-element             | SMRE2          | <i>ACCAACT</i>            | <i>ACC(A/T)A(A/C)(T/C)</i>       | EMSA, Protoplasts      | x                | Zhong and Ye, 2012 - Plant Cell Physiol                  |
| AtMYB083           | AC-element             | SMRE3          | <i>ACCAAAC</i>            | <i>ACC(A/T)A(A/C)(T/C)</i>       | EMSA, Protoplasts      | x                | Zhong and Ye, 2012 - Plant Cell Physiol                  |
| AtMYB083           | AC-element             | AC-II / SMRE4  | <i>ACCAACC</i>            | <i>ACC(A/T)A(A/C)(T/C)</i>       | EMSA, Protoplasts      | x                | Zhong and Ye, 2012 - Plant Cell Physiol                  |
| AtMYB083           | AC-element             | SMRE5          | <i>ACCTAAT</i>            | <i>ACC(A/T)A(A/C)(T/C)</i>       | EMSA, Protoplasts      | x                | Zhong and Ye, 2012 - Plant Cell Physiol                  |
| AtMYB083           | AC-element             | SMRE6          | <i>ACCTACT</i>            | <i>ACC(A/T)A(A/C)(T/C)</i>       | EMSA, Protoplasts      | x                | Zhong and Ye, 2012 - Plant Cell Physiol                  |
| AtMYB083           | AC-element             | AC-III / SMRE7 | <i>ACCTAAC</i>            | <i>ACC(A/T)A(A/C)(T/C)</i>       | EMSA, Protoplasts      | x                | Zhong and Ye, 2012 - Plant Cell Physiol                  |
| AtMYB083           | AC-element             | AC-I / SMRE8   | <i>ACCTACC</i>            | <i>ACC(A/T)A(A/C)(T/C)</i>       | EMSA, Protoplasts      | x                | Zhong and Ye, 2012 - Plant Cell Physiol                  |
| AtMYB084           | AC-element             | x              | <i>CACCTACCG</i> (R)      | <i>ACC(A/T)A(A/C)(T/C)</i>       | EMSA                   | x                | Romero <i>et al.</i> , 1998 - Plant J                    |
| AtMYB084           | AC-element             | x              | <i>CACCTATCG</i> (R)      | x                                | EMSA                   | x                | Romero <i>et al.</i> , 1998 - Plant J                    |
| AtMYB086           | AC-element             | x              | <i>ACCACAACC</i> (R)      | <i>ACC(A/T)(A/C/T)(A/C/T)</i>    | Y1H                    | x                | Dubos <i>et al.</i> , 2014 - BMC Genom                   |
| AtMYB086           | AC-element             | AC-III / SMRE7 | <i>CACCTAAC</i>           | <i>ACC(A/T)A(A/C)(T/C)</i>       | Y1H                    | x                | Dubos <i>et al.</i> , 2014 - BMC Genom                   |
| AtMYB086           | AC-element             | AC-II / SMRE4  | <i>CTAACCAACTAA</i> (R)   | <i>ACC(A/T)(A/C/T)(A/C/T)</i>    | Y1H                    | x                | Dubos <i>et al.</i> , 2014 - BMC Genom                   |
| AtMYB088           | FLP/MYB88 Binding site | x              | <i>gaaGCGGgaaa</i>        | <i>(A/T/G)(A/T/G)C(C/G)(C/G)</i> | EMSA                   | <i>AtCDKB1;1</i> | Xie <i>et al.</i> , 2010 - Plant Cell                    |
| AtMYB091 / AS1     | MYB-core type I        | x              | <i>CTGTTA</i>             | <i>CNGTTR</i>                    | EMSA, ChIP             | <i>AtBP</i>      | Guo <i>et al.</i> , 2008 - Plant Cell                    |
| AtMYB091 / AS1     | MYB-core Like          | x              | <i>CTGTTT</i>             | x                                | EMSA, ChIP             | <i>AtBP</i>      | Guo <i>et al.</i> , 2008 - Plant Cell                    |
| AtMYB091 / AS1     | MYB-core type I        | x              | <i>caCAGTTGga</i>         | <i>CNGTTR</i>                    | ChIP                   | <i>AtKNAT2</i>   | Guo <i>et al.</i> , 2008 - Plant Cell                    |
| AtMYB091 / AS1     | MYB-core type I        | x              | <i>ttCTGTTAct</i>         | <i>CNGTTR</i>                    | ChIP                   | <i>AtKNAT2</i>   | Guo <i>et al.</i> , 2008 - Plant Cell                    |
| AtMYB092           | AC-element             | x              | <i>ACCACAACC</i> (R)      | <i>ACC(A/T)(A/C/T)(A/C/T)</i>    | Y1H                    | x                | Dubos <i>et al.</i> , 2014 - BMC Genom                   |
| AtMYB092           | AC-element             | AC-III / SMRE7 | <i>CACCTAAC</i>           | <i>ACC(A/T)A(A/C)(T/C)</i>       | Y1H                    | x                | Dubos <i>et al.</i> , 2014 - BMC Genom                   |
| AtMYB092           | AC-element             | AC-II / SMRE4  | <i>CTAACCAACTAA</i> (R)   | <i>ACC(A/T)(A/C/T)(A/C/T)</i>    | Y1H                    | x                | Dubos <i>et al.</i> , 2014 - BMC Genom                   |
| AtMYB094           | AC-element             | x              | <i>ACCACAACC</i> (R)      | <i>ACC(A/T)(A/C/T)(A/C/T)</i>    | Y1H                    | x                | Dubos <i>et al.</i> , 2014 - BMC Genom                   |
| AtMYB094           | AC-element             | AC-III / SMRE7 | <i>CACCTAAC</i>           | <i>ACC(A/T)A(A/C)(T/C)</i>       | Y1H                    | x                | Dubos <i>et al.</i> , 2014 - BMC Genom                   |
| AtMYB094           | AC-element             | AC-II          | <i>CTAACCAACTAA</i> (R)   | <i>ACC(A/T)(A/C/T)(A/C/T)</i>    | Y1H                    | x                | Dubos <i>et al.</i> , 2014 - BMC Genom                   |
| AtMYB096           | MYB-core type II       | x              | <i>tcTAGTTAtt</i> (R)     | <i>TNGTTR</i>                    | EMSA, Protoplasts      | <i>AtKCS1</i>    | Seo <i>et al.</i> , 2011 - Plant Cell                    |
| AtMYB096           | MYB-core type II       | x              | <i>tcTAGTTAgt</i> (R)     | <i>TNGTTR</i>                    | EMSA, Protoplasts      | <i>AtKCS1</i>    | Seo <i>et al.</i> , 2011 - Plant Cell                    |
| AtMYB096           | MYB-core type II       | x              | <i>agTAGTTAagg</i> (R)    | <i>TNGTTR</i>                    | EMSA, Protoplasts      | <i>AtKCS2</i>    | Seo <i>et al.</i> , 2011 - Plant Cell                    |

|                 |                        |                |                   |                           |                                     |           |                                            |
|-----------------|------------------------|----------------|-------------------|---------------------------|-------------------------------------|-----------|--------------------------------------------|
| AtMYB096        | MYB-core type II       | x              | taTAGTTAgt (R)    | TNGTTR                    | EMSA, Protoplasts                   | AtKCS2    | Seo <i>et al.</i> , 2011 - Plant Cell      |
| AtMYB096        | MYB-core type I        | x              | atCAGTTAat (R)    | CNGTTR                    | EMSA, Protoplasts                   | AtKCS6    | Seo <i>et al.</i> , 2011 - Plant Cell      |
| AtMYB096        | MYB-core type I        | x              | tgCAGTTAag        | CNGTTR                    | EMSA, Protoplasts                   | AtKCR1    | Seo <i>et al.</i> , 2011 - Plant Cell      |
| AtMYB096        | MYB-core type I        | x              | tgCAGTTAatc (R)   | CNGTTR                    | EMSA, Protoplasts                   | AtKCR1    | Seo <i>et al.</i> , 2011 - Plant Cell      |
| AtMYB099        | AC-element             | AC-III / SMRE7 | CACCTAAC          | ACC(A/T)A(A/C)(T/C)       | Y1H                                 | x         | Dubos <i>et al.</i> , 2014 - BMC Genom     |
| AtMYB102 / AtM4 | AC-element             | AC-II          | CTAACCAACTAA (R)  | ACC(A/T)(A/C/T)(A/C/T)    | Y1H                                 | x         | Dubos <i>et al.</i> , 2014 - BMC Genom     |
| AtMYB103        | AC-element             | x              | ACCACAACC (R)     | ACC(A/T)(A/C/T)(A/C/T)    | Y1H                                 | x         | Dubos <i>et al.</i> , 2014 - BMC Genom     |
| AtMYB103        | AC-element             | AC-III / SMRE7 | CACCTAAC          | ACC(A/T)A(A/C)(T/C)       | Y1H                                 | x         | Dubos <i>et al.</i> , 2014 - BMC Genom     |
| AtMYB103        | AC-element             | AC-II / SMRE4  | CTAACCAACTAA (R)  | ACC(A/T)(A/C/T)(A/C/T)    | Y1H                                 | x         | Dubos <i>et al.</i> , 2014 - BMC Genom     |
| AtMYB107        | AC-element             | x              | ACCACAACC (R)     | ACC(A/T)(A/C/T)(A/C/T)    | Y1H                                 | x         | Dubos <i>et al.</i> , 2014 - BMC Genom     |
| AtMYB107        | AC-element             | AC-III / SMRE7 | CACCTAAC          | ACC(A/T)A(A/C)(T/C)       | Y1H                                 | x         | Dubos <i>et al.</i> , 2014 - BMC Genom     |
| AtMYB108 / BOS1 | AC-element             | SMRE3          | ACCAAACAT         | ACC(A/T)A(A/C)(T/C)       | Y1H                                 | x         | Dubos <i>et al.</i> , 2014 - BMC Genom     |
| AtMYB108 / BOS1 | AC-element             | AC-III / SMRE7 | CACCTAAC          | ACC(A/T)A(A/C)(T/C)       | Y1H                                 | x         | Dubos <i>et al.</i> , 2014 - BMC Genom     |
| AtMYB111 / PFG3 | AC-element             | AC-I / SMRE8   | ACCTACC (R)       | ACC(A/T)A(A/C)(T/C)       | Oligo Arrays                        | x         | Franco-Zorilla <i>et al.</i> , 2014 - PNAS |
| AtMYB111 / PFG3 | AC-element             | AC-I / SMRE8   | ACCTACC (R)       | ACC(A/T)A(A/C)(T/C)       | Oligo Arrays                        | x         | Franco-Zorilla <i>et al.</i> , 2014 - PNAS |
| AtMYB111 / PFG3 | AC-element             | AC-II / SMRE4  | CTAACCAACTAA (R)  | ACC(A/T)(A/C/T)(A/C/T)    | Y1H                                 | x         | Dubos <i>et al.</i> , 2014 - BMC Genom     |
| AtMYB112        | AC-element             | SMRE3          | ACCAAACAT         | ACC(A/T)A(A/C)(T/C)       | Y1H                                 | x         | Dubos <i>et al.</i> , 2014 - BMC Genom     |
| AtMYB118        | MYB-core type I        | x              | CCGTTA (R)        | CNGTTR                    | EMSA, Protoplasts, <i>in planta</i> | AtODD     | Barthole <i>et al.</i> , 2014 - Plant Cell |
| AtMYB123 / TT2  | MYB-core type I        | x              | CTGTTG            | CNGTTR                    | Y1H, Protoplasts, <i>in planta</i>  | AtBAN     | Thévenin <i>et al.</i> , 2012 - New Phytol |
| AtMYB123 / TT2  | MYB-core type II       | MST m2         | aaaGTTAGTTgga (R) | TNGTTR                    | Y1H, <i>in planta</i>               | AtTTG2    | Ishida <i>et al.</i> , 2007 - Plant Cell   |
| AtMYB123 / TT2  | MYB-core type II       | MST m3         | acgTTAGTTgaa (R)  | TNGTTR                    | Y1H, <i>in planta</i>               | AtTTG2    | Ishida <i>et al.</i> , 2007 - Plant Cell   |
| AtMYB124 / FLP  | FLP/MYB88 Binding site | SS-30          | GGCGGCC           | (A/T/G)(A/T/G)C(C/G)(C/G) | EMSA                                | x         | Xie <i>et al.</i> , 2010 - Plant Cell      |
| AtMYB124 / FLP  | FLP/MYB88 Binding site | x              | gaaGCGGgaa        | (A/T/G)(A/T/G)C(C/G)(C/G) | EMSA, <i>in planta</i>              | AtCDKB1;1 | Xie <i>et al.</i> , 2010 - Plant Cell      |
