# Supplementary material for: Analysis of the DNA-Binding Activities of the Arabidopsis R2R3-MYB Transcription Factor Family by One-Hybrid Experiments in Yeast
Source: PubMed Central journal article supplement (PMC4613820; doi:10.1371/journal.pone.0141044), 2015-10-20
Supplement: pone.0141044.s009.pdf [file pone.0141044.s009.pdf]

**Table S3: DNA motifs analysed in this study**

| DNA motifs from which <i>trans</i> -activation has been observed in yeast one-hybrid experiments |                  |                                          |
|--------------------------------------------------------------------------------------------------|------------------|------------------------------------------|
| Sequence                                                                                         | Type             | reference                                |
| <b>GTTGGTG</b>                                                                                   | AC-element       | Hatton <i>et al.</i> , 1995 - Plant J    |
| <b>GTTAGTG</b>                                                                                   | AC-element       | Hatton <i>et al.</i> , 1995 - Plant J    |
| <b>TAGTTA</b>                                                                                    | MYB-core Type II | Romero <i>et al.</i> , 1998 - Plant J    |
| <b>AGGTTA</b>                                                                                    | MYB-core like    | Solano <i>et al.</i> , 1995 - EMBO J     |
| <b>ACAAGTTA</b>                                                                                  | MYB-core Like    | x                                        |
| <b>AGTGGTTA</b>                                                                                  | MYB-core Type II | Solano <i>et al.</i> , 1995 - EMBO J     |
| <b>GACAGTTG</b>                                                                                  | MYB-core Type I  | Koshino-kimura <i>et al.</i> , 2005      |
| <b>TACTGTTG</b>                                                                                  | MYB-core Type I  | x                                        |
| <b>TCCGGTTG</b>                                                                                  | MYB-core Type I  | Song <i>et al.</i> , 2011- Plant Physiol |
| <b>AGTAGTTA</b>                                                                                  | MYB-core Type II | Solano <i>et al.</i> , 1995 - EMBO J     |
| <b>ATTAGTTG</b>                                                                                  | MYB-core Type II | Kang <i>et al.</i> , 2009 - Plant Cell   |
| <b>AAAAGTTA</b>                                                                                  | MYB-core Like    | Solano <i>et al.</i> , 1995 - EMBO J     |
| <b>GTCAGTTA</b>                                                                                  | MYB-core Type I  | Solano <i>et al.</i> , 1995 - EMBO J     |
| <b>GTTAGTTG</b>                                                                                  | MYB-core Type II | Song <i>et al.</i> , 2011- Plant Physiol |
| <b>GTTGTTG</b>                                                                                   | MYB-core Type II | Kang <i>et al.</i> , 2009 - Plant Cell   |
| <b>GTTAGTTA</b>                                                                                  | MYB-core Type II | Solano <i>et al.</i> , 1995 - EMBO J     |

#### References

- D. Hatton, R. Sablowski, M.H. Yung, C. Smith, W. Schuch and M. Bevan (1995) Two classes of cis sequences contribute to tissue-specific expression of a PAL2 promoter in transgenic tobacco. *Plant J*, **7**, 859-876.
- Y.H. Kang, V. Kirik, M. Hulskamp, K.H. Nam, K. Hagely, M.M. Lee and J. Schiefelbein (2009) The MYB23 gene provides a positive feedback loop for cell fate specification in the Arabidopsis root epidermis. *Plant Cell*, **21**, 1080-1094.
- Y. Koshino-Kimura, T. Wada, T. Tachibana, R. Tsugeki, S. Ishiguro and K. Okada (2005) Regulation of CAPRICE transcription by MYB proteins for root epidermis differentiation in Arabidopsis. *Plant Cell Physiol*, **46**, 817-826.
- I. Romero, A. Fuertes, M.J. Benito, J.M. Malpica, A. Leyva and J. Paz-Ares (1998) More than 80R2R3-MYB regulatory genes in the genome of Arabidopsis thaliana. *Plant J*, **14**, 273-284.
- R. Solano, C. Nieto, J. Avila, L. Canas, I. Diaz and J. Paz-Ares (1995) Dual DNA binding specificity of a petal epidermis-specific MYB transcription factor (MYB.Ph3) from *Petunia hybrida*. *Embo J*, **14**, 1773-1784.
- S.K. Song, K.H. Ryu, Y.H. Kang, J.H. Song, Y.H. Cho, S.D. Yoo, J. Schiefelbein and M.M. Lee (2011) Cell fate in the Arabidopsis root epidermis is determined by competition between WEREWOLF and CAPRICE. *Plant Physiol*, **157**, 1196-1208.
