# Supplementary material for: Analysis of the DNA-Binding Activities of the Arabidopsis R2R3-MYB Transcription Factor Family by One-Hybrid Experiments in Yeast
Source: PubMed Central journal article supplement (PMC4613820; doi:10.1371/journal.pone.0141044), 2015-10-20
Supplement: pone.0141044.s010.pdf [file pone.0141044.s010.pdf]

**Table S4.** Summary of yeast one-hybrid screens results. Each cell corresponds to an interaction between a R2R3-MYB protein and a DNA motif. Empty cells indicate that no interaction has been observed, whereas plus signs indicate a positive interaction (+ and ++ corresponding to a weak and strong interaction, respectively). Cells highlighted in yellow correspond to positive interactions already described in the literature that were confirmed in this study with either the full DNA sequence (bright yellow) or a part of it containing a MYB binding domain (light yellow). Cells highlighted in blue correspond to positive interactions described in the literature that were not confirmed in this study with either the full DNA sequence (dark blue) or a part of it containing a MYB binding domain (light blue). Cells highlighted in red correspond to negative interactions already described in the literature that were confirmed in this study with either the full DNA sequence (bright red) or a part of it containing a MYB binding domain (light red). Cells highlighted in green correspond to negative interactions described in the literature that were not confirmed in this study with either the full DNA sequence (dark green) or a part of it containing a MYB binding domain (light green). Stars indicate the DNA sequences that form an AC-rich element in between two consecutive DNA motifs (\*:group Ia, \*\*: from Id).

| R2R3-MYB subgroup | DBD subgroup | gene name | gene code   | goup I   |          |          |          |          | group Ia |             | group Ib     |         | group Ic |        |          |          | group Id |               | Number of interacting DNA motifs |
|-------------------|--------------|-----------|-------------|----------|----------|----------|----------|----------|----------|-------------|--------------|---------|----------|--------|----------|----------|----------|---------------|----------------------------------|
|                   |              |           |             | TACTGTTG | TGCGGTTG | AAAAGTTA | GTCAGTTA | ACAAGTTA | ATTAGTTG | GCTTGGT (*) | GTTAGTTG (*) | GGATGGT | GTTGGTG  | AGGTTA | AGTAGTTA | AGTGGTTA | TAGTTA   | GTTAGTTA (**) |                                  |
| S1                | S1           | AIMYB030  | AT3G28910   |          |          |          |          |          |          |             |              |         |          |        |          |          |          |               | 8                                |
| S1                | S1           | AIMYB031  | AT1G74650   | ++       | ++       | ++       | ++       | ++       | ++       | ++          | +            | +       |          |        |          |          | ++       | ++            | 10                               |
| S1                | S1           | AIMYB060  | AT1G08810.1 | ++       | ++       | ++       | ++       | ++       | ++       | ++          | ++           | +       |          |        |          |          | ++       | ++            | 9                                |
| S1                | S1           | AIMYB094  | AT3G47600   | ++       | ++       | ++       | ++       | ++       | ++       | ++          | ++           | +       |          |        |          |          | ++       | ++            | 10                               |
| S1                | S1           | AIMYB096  | AT5G62470.2 | ++       | ++       | ++       | ++       | ++       | ++       | ++          | +            |         |          |        |          |          | ++       | ++            | 11                               |
| S2                | S2           | AIMYB013  | AT1G06180   | ++       | ++       | ++       | ++       | ++       | ++       | ++          | ++           | ++      |          |        | ++       |          |          |               | 11                               |
| S2                | S2           | AIMYB014  | AT2G31180   | ++       | ++       | ++       | ++       | ++       | ++       | ++          | +            |         |          | ++     |          |          | ++       | +             | 14                               |
| S2                | S2           | AIMYB015  | AT3G23250.1 | ++       | ++       | ++       | ++       | ++       | ++       | ++          | ++           | ++      |          |        |          |          | ++       | +             | 10                               |
| S3                | S3           | AIMYB059  | AT1G16490   |          | +        | ++       | ++       | ++       | ++       | ++          | ++           | ++      |          |        |          |          |          | +             | 6                                |
| S3                | S3           | AIMYB063  | AT1G79180   |          |          |          |          |          |          |             |              |         |          |        |          |          |          |               | 11                               |
| SU                | S3           | AIMYB010  | AT3G12820   | ++       | +        | ++       | ++       | ++       | ++       | ++          | ++           | ++      |          |        |          |          | ++       | +             | 11                               |
| SU                | S3           | AIMYB072  | AT1G56160   | ++       | ++       | ++       | ++       | ++       | ++       | ++          | ++           | ++      | ++       |        |          |          |          |               | 11                               |
| S4                | S4           | AIMYB003  | AT1G22640   | ++       | ++       | ++       | ++       | ++       | ++       | ++          | +            |         |          | ++     |          |          |          | +             | 8                                |
| S4                | S4           | AIMYB004  | AT4G38620   |          | +        | +        | ++       | ++       | ++       | ++          | +            |         |          |        |          |          |          | +             | 6                                |
| S4                | S4           | AIMYB007  | AT2G16720   | ++       | ++       | ++       | ++       | ++       | ++       | ++          | ++           | ++      |          |        |          |          |          |               | 5                                |
| S4                | S4           | AIMYB032  | AT4G34990   | ++       | ++       | ++       | ++       | ++       | ++       | ++          | +            |         |          |        |          |          | +        |               | 9                                |
| SU                | S4           | AIMYB006  | AT4G09460   | ++       | ++       | ++       | ++       | ++       | ++       | ++          | ++           | ++      |          |        |          | ++       | ++       |               | 7                                |
| SU                | S4           | AIMYB008  | AT1G35515   | ++       | ++       | ++       | ++       | ++       | ++       | ++          | +            |         |          | ++     |          |          | ++       |               | 10                               |
| S5                | S5           | AIMYB123  | AT5G35550   | ++       | ++       | ++       | ++       | ++       | ++       | ++          | +            |         |          |        |          | +        | ++       |               | 11                               |
| SU                | S5           | AIMYB005  | AT3G13540   | ++       | ++       | ++       | ++       | ++       | ++       | ++          | ++           | ++      |          |        |          |          | ++       |               | 10                               |
| S6                | S6           | AIMYB090  | AT1G56850   | ++       | ++       | ++       | ++       | ++       | ++       | ++          | +            |         |          | ++     |          |          |          | +             | 8                                |
| S6                | S6           | AIMYB090  | AT1G66390   | ++       | ++       | ++       | ++       | ++       | ++       | ++          | ++           | ++      |          |        |          |          |          |               | 8                                |
| S6                | S6           | AIMYB113  | AT1G66370   | ++       | ++       | ++       | ++       | ++       | ++       | ++          | ++           | ++      |          |        | ++       | ++       |          |               | 10                               |
| S6                | S6           | AIMYB114  | AT1G66380   | ++       | ++       | ++       | ++       | ++       | ++       | ++          | ++           | ++      |          |        | ++       | ++       |          |               | 9                                |
| S7                | S7           | AIMYB011  | AT3G62610   | ++       | ++       | ++       | ++       | ++       | ++       | ++          | ++           | ++      |          |        | ++       | ++       |          |               | 9                                |
| S7                | S7           | AIMYB111  | AT5G49330   | ++       | +        | +        | ++       | ++       | ++       | ++          | ++           | ++      |          |        |          |          | ++       |               | 9                                |
| S9                | S9a          | AIMYB016  | AT5G15310.1 | ++       | +        | +        | ++       | ++       | ++       | ++          | +            |         |          |        |          |          |          |               | 8                                |
| S9                | S9b          | AIMYB017  | AT3G61250   | ++       | ++       | +        | ++       | ++       | ++       | ++          | ++           | ++      |          |        |          |          |          | +             | 6                                |
| S9                | S9a          | AIMYB106  | AT3G01140   | ++       | ++       | ++       | ++       | ++       | ++       | ++          | ++           | ++      |          |        |          |          |          |               | 6                                |
| S10               | S10          | AIMYB009  | AT5G16770   | ++       | ++       | ++       | ++       | ++       | ++       | ++          | ++           | ++      |          |        |          | ++       |          |               | 12                               |
| S10               | S10          | AIMYB039  | AT4G17785   | ++       | ++       | ++       | ++       | ++       | ++       | ++          | ++           | ++      |          |        |          | ++       |          |               | 9                                |
| S10               | S10          | AIMYB107  | AT3G02940   | ++       | ++       | ++       | ++       | ++       | ++       | ++          | ++           | ++      |          |        | ++       | ++       |          |               | 9                                |
| S11               | S11          | AIMYB041  | AT4G28110   | ++       | ++       | ++       | ++       | ++       | ++       | ++          | ++           | ++      |          |        | ++       | ++       |          |               | 11                               |
| S11               | S11          | AIMYB074  | AT4G05100   | ++       | ++       | ++       | ++       | ++       | ++       | ++          | ++           | ++      |          |        | ++       | ++       |          |               | 10                               |
| S11               | S11          | AIMYB102  | AT4G21440   | ++       | ++       | ++       | ++       | ++       | ++       | ++          | ++           | ++      |          |        | ++       | ++       |          |               | 9                                |
| SU                | S11          | AIMYB049  | AT5G45230   | ++       | ++       | ++       | ++       | ++       | ++       | ++          | ++           | ++      |          |        |          |          | ++       |               | 15                               |
| S12               | S12          | AIMYB028  | AT5G61420.2 | ++       | ++       | ++       | ++       | ++       | ++       | ++          | ++           | ++      |          |        | ++       | ++       |          |               | 10                               |
| S12               | S12          | AIMYB029  | AT5G07690   | ++       | ++       | +        | ++       | ++       | ++       | ++          | +            |         |          | ++     |          |          |          |               | 10                               |
| S12               | S12          | AIMYB034  | AT5G60890   | ++       | +        | ++       | ++       | ++       | ++       | ++          | ++           | ++      |          |        | ++       | ++       |          |               | 7                                |
| S12               | S12          | AIMYB051  | AT1G18570   | ++       | +        | ++       | ++       | ++       | ++       | ++          | +            |         |          | ++     |          | ++       |          | +             | 10                               |
| S12               | S12          | AIMYB076  | AT5G07700   | ++       | ++       | ++       | ++       | ++       | ++       | ++          | ++           | ++      |          |        | ++       | ++       |          | +             | 8                                |
| S12               | S12          | AIMYB122  | AT1G74080   | ++       | ++       | ++       | ++       | ++       | ++       | ++          | ++           | ++      |          |        | ++       | ++       |          |               | 7                                |
| S13               | S13          | AIMYB050  | AT1G57560   | ++       | ++       | ++       | ++       | ++       | ++       | ++          | ++           | ++      |          |        |          |          | ++       |               | 12                               |
| S13               | S13          | AIMYB055  | AT4G01680.1 | ++       | ++       | ++       | ++       | ++       | ++       | ++          | ++           | ++      |          |        |          |          | ++       |               | 10                               |
| S13               | S13          | AIMYB061  | AT1G09540   | ++       | ++       | ++       | ++       | ++       | ++       | ++          | ++           | ++      |          |        |          |          | ++       |               | 10                               |
| S13               | S13          | AIMYB086  | AT5G26660   | ++       | ++       | ++       | ++       | ++       | ++       | ++          | ++           | ++      |          |        |          |          | ++       |               | 12                               |
| S14               | S14          | AIMYB036  | AT5G57620   | ++       | ++       | ++       | ++       | ++       | ++       | ++          | ++           | ++      |          |        |          |          | ++       |               | 10                               |
| S14               | S14          | AIMYB037  | AT5G23000   | ++       | ++       | +        | ++       | ++       | ++       | ++          | ++           | ++      |          |        |          |          |          | +             | 9                                |
| S14               | S14          | AIMYB038  | AT2G36890   | ++       | ++       | +        | ++       | ++       | ++       | ++          | ++           | ++      |          |        |          |          | ++       |               | 9                                |
| S14               | S14          | AIMYB068  | AT5G65790   | ++       | ++       | ++       | ++       | ++       | ++       | ++          | +            |         |          | ++     |          |          |          | +             | 10                               |
| S14               | S14          | AIMYB084  | AT3G49690   | ++       | ++       | +        | ++       | ++       | ++       | ++          | +            |         |          | ++     |          | ++       |          |               | 8                                |
| S14               | S14          | AIMYB087  | AT4G37780   | ++       | ++       | +        | ++       | ++       | ++       | ++          | +            |         |          | ++     |          | ++       |          |               | 9                                |
| S15               | S15          | AIMYB000  | AT3G27920   | ++       | ++       | ++       | ++       | ++       | ++       | ++          | ++           | ++      |          |        | ++       | ++       |          |               | 9                                |
| S15               | S15          | AIMYB023  | AT5G40330   | ++       | ++       | ++       | ++       | ++       | ++       | ++          | ++           | ++      |          |        | ++       | ++       |          |               | 9                                |
| S15               | S15          | AIMYB066  | AT5G14750   | ++       | ++       | ++       | ++       | ++       | ++       | ++          | ++           | ++      |          |        | ++       | ++       |          |               | 10                               |
| SU                | S15          | AIMYB082  | AT5G52600   | ++       | +        | ++       | ++       | ++       | ++       | ++          | +            |         |          | ++     | ++       | ++       |          |               | 14                               |
| S16               | S16          | AIMYB018  | AT4G25560   | ++       | ++       | ++       | ++       | ++       | ++       | ++          | +            |         |          | ++     | ++       | ++       |          |               | 11                               |
| S16               | S16          | AIMYB019  | AT5G52260   | ++       | ++       | ++       | ++       | ++       | ++       | ++          | ++           | ++      |          |        | ++       | ++       |          |               | 11                               |
| S16               | S16          | AIMYB045  | AT3G48920   | ++       | ++       | ++       | ++       | ++       | ++       | ++          | ++           | ++      |          |        |          |          | ++       |               | 11                               |
| S18               | S18          | AIMYB033  | AT5G06100.2 | ++       | ++       | ++       | ++       | ++       | ++       | ++          | ++           | ++      |          |        |          |          |          |               | 7                                |
| S18               | S18          | AIMYB065  | AT3G11440   | ++       | ++       | ++       | ++       | ++       | ++       | ++          | ++           | ++      |          |        |          |          | ++       |               | 5                                |
| S18               | S18          | AIMYB081  | AT2G26960   | ++       | ++       | ++       | ++       | ++       | ++       | ++          | ++           | ++      |          |        | ++       |          |          |               | 9                                |
| S18               | S18          | AIMYB097  | AT4G26930   | ++       | +        | ++       | ++       | ++       | ++       | ++          | ++           | ++      |          |        | ++       |          |          |               | 4                                |
| S18               | S18          | AIMYB101  | AT2G32450.1 | ++       | ++       | +        | ++       | ++       | ++       | ++          | ++           | ++      |          |        | ++       | ++       |          |               | 3                                |
| S18               | S18          | AIMYB104  | AT2G26950   | ++       | ++       | +        | ++       | ++       | ++       | ++          | ++           | ++      |          |        |          |          |          |               | 2                                |
| S19               | S19          | AIMYB021  | AT3G27810   | ++       | +        | ++       | ++       | ++       | ++       | ++          | +            |         |          | ++     | ++       | ++       |          |               | 6                                |
| S19               | S19          | AIMYB024  | AT5G40350   | ++       | +        | ++       | ++       | ++       | ++       | ++          | ++           | ++      |          |        |          |          |          |               | 7                                |
| S20               | S20b         | AIMYB002  | AT2G47190   | ++       | +        | ++       | ++       | ++       | ++       | ++          | ++           | ++      |          |        |          |          |          |               | 6                                |
| S20               | S20a         | AIMYB062  | AT1G68320   | ++       | ++       | ++       | ++       | ++       | ++       | ++          | ++           | ++      |          |        | ++       |          |          |               | 8                                |
