# Supplementary material for: Analysis of the DNA-Binding Activities of the Arabidopsis R2R3-MYB Transcription Factor Family by One-Hybrid Experiments in Yeast
Source: PubMed Central journal article supplement (PMC4613820; doi:10.1371/journal.pone.0141044), 2015-10-20
Supplement: pone.0141044.s011.pdf [file pone.0141044.s011.pdf]

Table S4. Primers used in this study.

Primers used for their cloning of the representative gene models (P2 to P9 were used for exons amplification from genomic DNA as template).

| gene name | gene code   | Primers sense                  | antisense                                | P2                                           |
|-----------|-------------|--------------------------------|------------------------------------------|----------------------------------------------|
| ALMYB030  | AT17628910  | GGAGATAGAACCATTGGTGGGCTCTCTTTG | TCCACCTCCGGATCMGAAGAAATFAGTGTTCATCCCATAG |                                              |
| ALMYB031  | AT17648300  | GGAGATAGAACCATTGGTGGGCTCTCTTTG | TCCACCTCCGGATCMGAAGAAATFAGTGTTCATCCCATAG |                                              |
| ALMYB060  | AT1058810   | GGAGATAGAACCATTGGTGGGCTCTCTTTG | TCCACCTCCGGATCMGAAGAAATFAGTGTTCATCCCATAG |                                              |
| ALMYB094  | AT13647600  | GGAGATAGAACCATTGGTGGGCTCTCTTTG | TCCACCTCCGGATCMGAAGAAATFAGTGTTCATCCCATAG |                                              |
| ALMYB096  | AT5662470.2 | GGAGATAGAACCATTGGTGGGCTCTCTTTG | TCCACCTCCGGATCMGAAGAAATFAGTGTTCATCCCATAG |                                              |
| ALMYB013  | AT1106180   | GGAGATAGAACCATTGGTGGGCTCTCTTTG | TCCACCTCCGGATCMGAAGAAATFAGTGTTCATCCCATAG |                                              |
| ALMYB014  | AT1251190   | GGAGATAGAACCATTGGTGGGCTCTCTTTG | TCCACCTCCGGATCMGAAGAAATFAGTGTTCATCCCATAG |                                              |
| ALMYB015  | AT3623280.1 | GGAGATAGAACCATTGGTGGGCTCTCTTTG | TCCACCTCCGGATCMGAAGAAATFAGTGTTCATCCCATAG |                                              |
| ALMYB056  | AT11016490  | GGAGATAGAACCATTGGTGGGCTCTCTTTG | TCCACCTCCGGATCMGAAGAAATFAGTGTTCATCCCATAG |                                              |
| ALMYB063  | AT1079180   | GGAGATAGAACCATTGGTGGGCTCTCTTTG | TCCACCTCCGGATCMGAAGAAATFAGTGTTCATCCCATAG |                                              |
| ALMYB003  | AT1102260   | GGAGATAGAACCATTGGTGGGCTCTCTTTG | TCCACCTCCGGATCMGAAGAAATFAGTGTTCATCCCATAG | CTTTTACCACATCTTTTGTAAATCCCGCCGGCCAGGGAGAGATC |
| ALMYB004  | AT1026820   | GGAGATAGAACCATTGGTGGGCTCTCTTTG | TCCACCTCCGGATCMGAAGAAATFAGTGTTCATCCCATAG |                                              |
| ALMYB009  | AT22616720  | GGAGATAGAACCATTGGTGGGCTCTCTTTG | TCCACCTCCGGATCMGAAGAAATFAGTGTTCATCCCATAG |                                              |
| ALMYB032  | AT14634990  | GGAGATAGAACCATTGGTGGGCTCTCTTTG | TCCACCTCCGGATCMGAAGAAATFAGTGTTCATCCCATAG |                                              |
| ALMYB123  | AT5635550   | GGAGATAGAACCATTGGTGGGCTCTCTTTG | TCCACCTCCGGATCMGAAGAAATFAGTGTTCATCCCATAG |                                              |
| ALMYB075  | AT1056650   | GGAGATAGAACCATTGGTGGGCTCTCTTTG | TCCACCTCCGGATCMGAAGAAATFAGTGTTCATCCCATAG |                                              |
| ALMYB090  | AT1106390   | GGAGATAGAACCATTGGTGGGCTCTCTTTG | TCCACCTCCGGATCMGAAGAAATFAGTGTTCATCCCATAG | CTTTTCCGCATCGTTTGGCCACCTCTCAAGGAACTTGATG     |
| ALMYB113  | AT1066370   | GGAGATAGAACCATTGGTGGGCTCTCTTTG | TCCACCTCCGGATCMGAAGAAATFAGTGTTCATCCCATAG |                                              |
| ALMYB114  | AT11066380  | GGAGATAGAACCATTGGTGGGCTCTCTTTG | TCCACCTCCGGATCMGAAGAAATFAGTGTTCATCCCATAG |                                              |
| ALMYB011  | AT3662610   | GGAGATAGAACCATTGGTGGGCTCTCTTTG | TCCACCTCCGGATCMGAAGAAATFAGTGTTCATCCCATAG | CTTTTCCACATCTTTTGGCCGGCATTTTGGGAGAGATC       |
| ALMYB012  | AT2647460   | GGAGATAGAACCATTGGTGGGCTCTCTTTG | TCCACCTCCGGATCMGAAGAAATFAGTGTTCATCCCATAG | CTTTTCCACATCTTTTGGCCGGCATTTTGGGAGAGATC       |
| ALMYB111  | AT1051930   | GGAGATAGAACCATTGGTGGGCTCTCTTTG | TCCACCTCCGGATCMGAAGAAATFAGTGTTCATCCCATAG |                                              |
| ALMYB016  | AT1011910.1 | GGAGATAGAACCATTGGTGGGCTCTCTTTG | TCCACCTCCGGATCMGAAGAAATFAGTGTTCATCCCATAG |                                              |
| ALMYB017  | AT3661250   | GGAGATAGAACCATTGGTGGGCTCTCTTTG | TCCACCTCCGGATCMGAAGAAATFAGTGTTCATCCCATAG |                                              |
| ALMYB106  | AT3601140   | GGAGATAGAACCATTGGTGGGCTCTCTTTG | TCCACCTCCGGATCMGAAGAAATFAGTGTTCATCCCATAG | GCCTTATCAACATGGGATATGATCATGATCATGATC         |
| ALMYB009  | AT5616770   | GGAGATAGAACCATTGGTGGGCTCTCTTTG | TCCACCTCCGGATCMGAAGAAATFAGTGTTCATCCCATAG | ATTACCAGCTATGACAGCACTGTTCCCAAGAGGAATGG       |
| ALMYB039  | AT4017795   | GGAGATAGAACCATTGGTGGGCTCTCTTTG | TCCACCTCCGGATCMGAAGAAATFAGTGTTCATCCCATAG | TGACCCCAATTTTCCACCTTTTGTCCAGAGGCGATG         |
| ALMYB041  | AT1002940   | GGAGATAGAACCATTGGTGGGCTCTCTTTG | TCCACCTCCGGATCMGAAGAAATFAGTGTTCATCCCATAG |                                              |
| ALMYB041  | AT14628110  | GGAGATAGAACCATTGGTGGGCTCTCTTTG | TCCACCTCCGGATCMGAAGAAATFAGTGTTCATCCCATAG |                                              |
| ALMYB074  | AT4605100   | GGAGATAGAACCATTGGTGGGCTCTCTTTG | TCCACCTCCGGATCMGAAGAAATFAGTGTTCATCCCATAG |                                              |
| ALMYB102  | AT4021440   | GGAGATAGAACCATTGGTGGGCTCTCTTTG | TCCACCTCCGGATCMGAAGAAATFAGTGTTCATCCCATAG |                                              |
| ALMYB028  | AT5661420.2 | GGAGATAGAACCATTGGTGGGCTCTCTTTG | TCCACCTCCGGATCMGAAGAAATFAGTGTTCATCCCATAG |                                              |
| ALMYB038  | AT1007680   | GGAGATAGAACCATTGGTGGGCTCTCTTTG | TCCACCTCCGGATCMGAAGAAATFAGTGTTCATCCCATAG |                                              |
| ALMYB034  | AT5660890   | GGAGATAGAACCATTGGTGGGCTCTCTTTG | TCCACCTCCGGATCMGAAGAAATFAGTGTTCATCCCATAG |                                              |
| ALMYB051  | AT1161850   | GGAGATAGAACCATTGGTGGGCTCTCTTTG | TCCACCTCCGGATCMGAAGAAATFAGTGTTCATCCCATAG |                                              |
| ALMYB076  | AT5607700   | GGAGATAGAACCATTGGTGGGCTCTCTTTG | TCCACCTCCGGATCMGAAGAAATFAGTGTTCATCCCATAG |                                              |
| ALMYB122  | AT1074080   | GGAGATAGAACCATTGGTGGGCTCTCTTTG | TCCACCTCCGGATCMGAAGAAATFAGTGTTCATCCCATAG |                                              |
| ALMYB050  | AT1037680   | GGAGATAGAACCATTGGTGGGCTCTCTTTG | TCCACCTCCGGATCMGAAGAAATFAGTGTTCATCCCATAG |                                              |
| ALMYB055  | AT4601880.1 | GGAGATAGAACCATTGGTGGGCTCTCTTTG | TCCACCTCCGGATCMGAAGAAATFAGTGTTCATCCCATAG |                                              |
| ALMYB061  | AT1100950   | GGAGATAGAACCATTGGTGGGCTCTCTTTG | TCCACCTCCGGATCMGAAGAAATFAGTGTTCATCCCATAG |                                              |
| ALMYB086  | AT5626660   | GGAGATAGAACCATTGGTGGGCTCTCTTTG | TCCACCTCCGGATCMGAAGAAATFAGTGTTCATCCCATAG | CTTTTCCACATCTTTTGAACCTCGGATTTAGGACAGAAC      |
| ALMYB036  | AT5057620   | GGAGATAGAACCATTGGTGGGCTCTCTTTG | TCCACCTCCGGATCMGAAGAAATFAGTGTTCATCCCATAG | CCACATCTCTCCAGCCCAACATTTTGGAGGAGTG           |
| ALMYB031  | AT5623000   | GGAGATAGAACCATTGGTGGGCTCTCTTTG | TCCACCTCCGGATCMGAAGAAATFAGTGTTCATCCCATAG |                                              |
| ALMYB036  | AT21636890  | GGAGATAGAACCATTGGTGGGCTCTCTTTG | TCCACCTCCGGATCMGAAGAAATFAGTGTTCATCCCATAG |                                              |
| ALMYB068  | AT5665790   | GGAGATAGAACCATTGGTGGGCTCTCTTTG | TCCACCTCCGGATCMGAAGAAATFAGTGTTCATCCCATAG |                                              |
| ALMYB084  | AT3649690   | GGAGATAGAACCATTGGTGGGCTCTCTTTG | TCCACCTCCGGATCMGAAGAAATFAGTGTTCATCCCATAG |                                              |
| ALMYB087  | AT4037790   | GGAGATAGAACCATTGGTGGGCTCTCTTTG | TCCACCTCCGGATCMGAAGAAATFAGTGTTCATCCCATAG |                                              |
| ALMYB000  | AT5627920   | GGAGATAGAACCATTGGTGGGCTCTCTTTG | TCCACCTCCGGATCMGAAGAAATFAGTGTTCATCCCATAG |                                              |
| ALMYB023  | AT5640330   | GGAGATAGAACCATTGGTGGGCTCTCTTTG | TCCACCTCCGGATCMGAAGAAATFAGTGTTCATCCCATAG |                                              |
| ALMYB066  | AT5614750   | GGAGATAGAACCATTGGTGGGCTCTCTTTG | TCCACCTCCGGATCMGAAGAAATFAGTGTTCATCCCATAG |                                              |
| ALMYB018  | AT4625560   | GGAGATAGAACCATTGGTGGGCTCTCTTTG | TCCACCTCCGGATCMGAAGAAATFAGTGTTCATCCCATAG |                                              |
| ALMYB019  | AT5052260   | GGAGATAGAACCATTGGTGGGCTCTCTTTG | TCCACCTCCGGATCMGAAGAAATFAGTGTTCATCCCATAG |                                              |
| ALMYB045  | AT13448920  | GGAGATAGAACCATTGGTGGGCTCTCTTTG | TCCACCTCCGGATCMGAAGAAATFAGTGTTCATCCCATAG | CTTTTCCCATCTCCCGCACTCCAGTGAAGAGGAATATAC      |
| ALMYB032  | AT5606100.2 | GGAGATAGAACCATTGGTGGGCTCTCTTTG | TCCACCTCCGGATCMGAAGAAATFAGTGTTCATCCCATAG |                                              |
| ALMYB081  | AT2626960   | GGAGATAGAACCATTGGTGGGCTCTCTTTG | TCCACCTCCGGATCMGAAGAAATFAGTGTTCATCCCATAG |                                              |
| ALMYB097  | AT4626930   | GGAGATAGAACCATTGGTGGGCTCTCTTTG | TCCACCTCCGGATCMGAAGAAATFAGTGTTCATCCCATAG | CTTATCTGTCTGCTGGTAACTGAGCAGCATGGAGCCCA       |
| ALMYB101  | AT2632760.1 | GGAGATAGAACCATTGGTGGGCTCTCTTTG | TCCACCTCCGGATCMGAAGAAATFAGTGTTCATCCCATAG | CTTATCTGTCTGCTGGTAACTGAGCAGCATGGAGCCCA       |
| ALMYB104  | AT5628950   | GGAGATAGAACCATTGGTGGGCTCTCTTTG | TCCACCTCCGGATCMGAAGAAATFAGTGTTCATCCCATAG | CTTATCTGTCTGCTGGTAACTGAGCAGCATGGAGCCCA       |
| ALMYB120  | AT5655020   | GGAGATAGAACCATTGGTGGGCTCTCTTTG | TCCACCTCCGGATCMGAAGAAATFAGTGTTCATCCCATAG | CTTATCTGTCTGCTGGTAACTGAGCAGCATGGAGCCCA       |
| ALMYB021  | AT3627810   | GGAGATAGAACCATTGGTGGGCTCTCTTTG | TCCACCTCCGGATCMGAAGAAATFAGTGTTCATCCCATAG | CTTATCTGTCTGCTGGTAACTGAGCAGCATGGAGCCCA       |
| ALMYB024  | AT5640350   | GGAGATAGAACCATTGGTGGGCTCTCTTTG | TCCACCTCCGGATCMGAAGAAATFAGTGTTCATCCCATAG | CTTATCTGTCTGCTGGTAACTGAGCAGCATGGAGCCCA       |
| ALMYB002  | AT2647190   | GGAGATAGAACCATTGGTGGGCTCTCTTTG | TCCACCTCCGGATCMGAAGAAATFAGTGTTCATCCCATAG | CTTATCTGTCTGCTGGTAACTGAGCAGCATGGAGCCCA       |
| ALMYB02   | AT1104390   | GGAGATAGAACCATTGGTGGGCTCTCTTTG | TCCACCTCCGGATCMGAAGAAATFAGTGTTCATCCCATAG | CTTATCTGTCTGCTGGTAACTGAGCAGCATGGAGCCCA       |
| ALMYB078  | AT5649620.2 | GGAGATAGAACCATTGGTGGGCTCTCTTTG | TCCACCTCCGGATCMGAAGAAATFAGTGTTCATCCCATAG | CTTATCTGTCTGCTGGTAACTGAGCAGCATGGAGCCCA       |
| ALMYB108  | AT3606490   | GGAGATAGAACCATTGGTGGGCTCTCTTTG | TCCACCTCCGGATCMGAAGAAATFAGTGTTCATCCCATAG | CTTATCTGTCTGCTGGTAACTGAGCAGCATGGAGCCCA       |
| ALMYB112  | AT1148000   | GGAGATAGAACCATTGGTGGGCTCTCTTTG | TCCACCTCCGGATCMGAAGAAATFAGTGTTCATCCCATAG | CTTATCTGTCTGCTGGTAACTGAGCAGCATGGAGCCCA       |
| ALMYB016  | AT1102340.1 | GGAGATAGAACCATTGGTGGGCTCTCTTTG | TCCACCTCCGGATCMGAAGAAATFAGTGTTCATCCCATAG | CTTATCTGTCTGCTGGTAACTGAGCAGCATGGAGCCCA       |
| ALMYB052  | AT1102340.2 | GGAGATAGAACCATTGGTGGGCTCTCTTTG | TCCACCTCCGGATCMGAAGAAATFAGTGTTCATCCCATAG | CTTATCTGTCTGCTGGTAACTGAGCAGCATGGAGCCCA       |
| ALMYB054  | AT1073410   | GGAGATAGAACCATTGGTGGGCTCTCTTTG | TCCACCTCCGGATCMGAAGAAATFAGTGTTCATCCCATAG | CTTATCTGTCTGCTGGTAACTGAGCAGCATGGAGCCCA       |
| ALMYB056  | AT5617800   | GGAGATAGAACCATTGGTGGGCTCTCTTTG | TCCACCTCCGGATCMGAAGAAATFAGTGTTCATCCCATAG | CTTATCTGTCTGCTGGTAACTGAGCAGCATGGAGCCCA       |
| ALMYB069  | AT4623450   | GGAGATAGAACCATTGGTGGGCTCTCTTTG | TCCACCTCCGGATCMGAAGAAATFAGTGTTCATCCCATAG | CTTATCTGTCTGCTGGTAACTGAGCAGCATGGAGCCCA       |
| ALMYB105  | AT1106950   | GGAGATAGAACCATTGGTGGGCTCTCTTTG | TCCACCTCCGGATCMGAAGAAATFAGTGTTCATCCCATAG | CTTATCTGTCTGCTGGTAACTGAGCAGCATGGAGCCCA       |
| ALMYB110  | AT5639020.2 | GGAGATAGAACCATTGGTGGGCTCTCTTTG | TCCACCTCCGGATCMGAAGAAATFAGTGTTCATCCCATAG | CTTATCTGTCTGCTGGTAACTGAGCAGCATGGAGCCCA       |
| ALMYB111  | AT1026780.1 | GGAGATAGAACCATTGGTGGGCTCTCTTTG | TCCACCTCCGGATCMGAAGAAATFAGTGTTCATCCCATAG | CTTATCTGTCTGCTGGTAACTGAGCAGCATGGAGCCCA       |
| ALMYB044  | AT5667300   | GGAGATAGAACCATTGGTGGGCTCTCTTTG | TCCACCTCCGGATCMGAAGAAATFAGTGTTCATCCCATAG | CTTATCTGTCTGCTGGTAACTGAGCAGCATGGAGCCCA       |
| ALMYB070  | AT2623290   | GGAGATAGAACCATTGGTGGGCTCTCTTTG | TCCACCTCCGGATCMGAAGAAATFAGTGTTCATCCCATAG | CTTATCTGTCTGCTGGTAACTGAGCAGCATGGAGCCCA       |
| ALMYB073  | AT4637260   | GGAGATAGAACCATTGGTGGGCTCTCTTTG | TCCACCTCCGGATCMGAAGAAATFAGTGTTCATCCCATAG | CTTATCTGTCTGCTGGTAACTGAGCAGCATGGAGCCCA       |
| ALMYB077  | AT5600600   | GGAGATAGAACCATTGGTGGGCTCTCTTTG | TCCACCTCCGGATCMGAAGAAATFAGTGTTCATCCCATAG | CTTATCTGTCTGCTGGTAACTGAGCAGCATGGAGCCCA       |
| ALMYB080  | AT5609930   | GGAGATAGAACCATTGGTGGGCTCTCTTTG | TCCACCTCCGGATCMGAAGAAATFAGTGTTCATCCCATAG | CTTATCTGTCTGCTGGTAACTGAGCAGCATGGAGCCCA       |
| ALMYB082  | AT5609930   | GGAGATAGAACCATTGGTGGGCTCTCTTTG | TCCACCTCCGGATCMGAAGAAATFAGTGTTCATCCCATAG | CTTATCTGTCTGCTGGTAACTGAGCAGCATGGAGCCCA       |
| ALMYB085  | AT2639880   | GGAGATAGAACCATTGGTGGGCTCTCTTTG | TCCACCTCCGGATCMGAAGAAATFAGTGTTCATCCCATAG | CTTATCTGTCTGCTGGTAACTGAGCAGCATGGAGCCCA       |
| ALMYB109  | AT3655730   | GGAGATAGAACCATTGGTGGGCTCTCTTTG | TCCACCTCCGGATCMGAAGAAATFAGTGTTCATCCCATAG | CTTATCTGTCTGCTGGTAACTGAGCAGCATGGAGCCCA       |
| ALMYB053  | AT5665230   | GGAGATAGAACCATTGGTGGGCTCTCTTTG | TCCACCTCCGGATCMGAAGAAATFAGTGTTCATCCCATAG | CTTATCTGTCTGCTGGTAACTGAGCAGCATGGAGCCCA       |
| ALMYB092  | AT5610280   | GGAGATAGAACCATTGGTGGGCTCTCTTTG | TCCACCTCCGGATCMGAAGAAATFAGTGTTCATCCCATAG | CTTATCTGTCTGCTGGTAACTGAGCAGCATGGAGCCCA       |







| P8                                     | P9                                        |
|----------------------------------------|-------------------------------------------|
| CAAGCTGTTGGTCCCGTTCCCTGGTTGGTTAGTCCAGT | ACTGGACTAAACCAAACCAAGGAACGGAGACCAACAGCTTG |
